# Supplementary material for: Microplastics in Internal Tissues of Companion Animals from Urban Environments
Source: Animals (Basel). 2022 Aug 4;12(15):1979. doi: 10.3390/ani12151979 (PMC9367336; doi:10.3390/ani12151979)
Supplement: Supplementary file 1 [file animals-12-01979-s001.zip › animals-1818800-supplementary.pdf]

## Microplastics in internal tissues of companion animals from urban environments

### Supplementary Material

**Table S1.** Characteristics of samples companion animals.

| Characteristic | Cats                                                                                     | Dogs                                                                                                                                                                                                  |
|----------------|------------------------------------------------------------------------------------------|-------------------------------------------------------------------------------------------------------------------------------------------------------------------------------------------------------|
| Sex            | 15 Females<br>9 Males                                                                    | 9 Females<br>16 Males                                                                                                                                                                                 |
| Age            | 6 adults (1 – 7 years)<br>17 seniors (≥8 years)<br>1 undetermined                        | 1 junior (<1 year)<br>7 adults (1 – 7 years)<br>15 seniors (≥8 years)<br>2 undetermined                                                                                                               |
| Breeds         | European shorthairs (22), Persian (1), Persian crossbreed (1).                           | Mix-breed (12), Cocker Spaniels (3), Basset Hounds (2), Labradors (2), Shar-pei (1), English Bulldog (1), French Bulldog (1), Bernese Mountain Dog (1), Belgian Shepherd (1), Pitbull crossbreed (1). |
| Cause of death | Respiratory system (4), urinary system (7), digestive system (1), cancer (6), others (6) | Respiratory system (4), urinary system (5), digestive system (2), cancer (4), others (10)                                                                                                             |
| Stray animals  | 2                                                                                        | 1                                                                                                                                                                                                     |

**Table S2.** Number of suspected microplastics found in 23% of the filter of the procedural blanks.

| Batch | Blank         | ]1, 10] | ]10, 20] | ]20, 50] | ]50, 100] | ]100, 5000] |
|-------|---------------|---------|----------|----------|-----------|-------------|
| 1     | 1             | 12      | 3        | 0        | 0         | 0           |
|       | 2             | 6       | 4        | 1        | 0         | 0           |
|       | <i>Median</i> | 9       | 4        | 1        | 0         | 0           |
| 2     | 1             | 1       | 1        | 0        | 0         | 0           |
|       | 2             | 0       | 0        | 0        | 0         | 0           |
|       | 3             | 0       | 0        | 0        | 0         | 0           |
|       | 4             | 3       | 0        | 0        | 0         | 0           |
|       | <i>Median</i> | 1       | 0        | 0        | 0         | 0           |

**Table S3.** Samples where suspected microplastics were detected, after blank correction, for each tissue and species, compared to the total of samples.

| Species | Liver | Lungs | Ileum | Kidney | Blood clot |
|---------|-------|-------|-------|--------|------------|
| Cat     | 10/24 | 11/24 | 7/24  | 11/24  | 7/22       |
| Dog     | 4/25  | 8/25  | 10/25 | 11/25  | 1/24       |
| Total   | 14/49 | 19/49 | 17/49 | 22/49  | 8/46       |

**Table S4.** Median particle dimensions (µm) as largest dimension (Feret), smallest dimension (MinFeret), and equivalent diameter calculated from the particle's area.

| Dimension (µm)           |                           |                            |
|--------------------------|---------------------------|----------------------------|
| <u>Largest dimension</u> | <u>Smallest dimension</u> | <u>Equivalent diameter</u> |

|            |      |     |      |
|------------|------|-----|------|
| Lungs      | 8.1  | 5.5 | 6.0  |
| Blood clot | 12.1 | 8.9 | 10.3 |
| Kidney     | 10.3 | 7.7 | 8.5  |
| Ileum      | 6.4  | 3.6 | 4.5  |
| Liver      | 9.8  | 6.7 | 7.6  |

**Table S5.** Median equivalent diameter ( $\mu\text{m}$ ) for each tissue by species. Median equivalent diameter ( $\mu\text{m}$ ), median sample wet weight (g), and weight loss (%) corresponding to the efficiency of the digestion procedure for both species.

| Tissue     | Cat      |                            | Dog      |                            | Total                      |            |                 |
|------------|----------|----------------------------|----------|----------------------------|----------------------------|------------|-----------------|
|            | <i>n</i> | Diameter ( $\mu\text{m}$ ) | <i>n</i> | Diameter ( $\mu\text{m}$ ) | Diameter ( $\mu\text{m}$ ) | Weight (g) | Weight loss (%) |
| Lungs      | 24       | 6.8                        | 25       | 5.3                        | 6.0                        | 3.1        | 99.7            |
| Blood clot | 22       | 10.5                       | 24       | 6.6                        | 10.3                       | 2.5        | 97.3            |
| Kidney     | 24       | 9.6                        | 25       | 6.8                        | 8.5                        | 5.1        | 99.2            |
| Ileum      | 24       | 3.9                        | 25       | 6.7                        | 4.5                        | 2.7        | 98.1            |
| Liver      | 24       | 9.6                        | 25       | 6.4                        | 7.6                        | 3.9        | 99.5            |

**Table S6.** Median (min – max) of the concentration of suspected microplastics ( $\text{MP g}^{-1}$ ) found in 23% of the sample filter membrane after blank corrections by size categories, and number of individual samples containing suspected microplastics (*n*) per internal tissues of companion animals.

| Sizes ( $\mu\text{m}$ ) | Median (min-max) of suspected microplastics in 23% of sample filter |                       |                     |                     |                    |
|-------------------------|---------------------------------------------------------------------|-----------------------|---------------------|---------------------|--------------------|
|                         | Lungs                                                               | Blood clot            | Kidney              | Ileum               | Liver              |
| [1,10]                  | 0.0<br>(0.0 – 20.5)                                                 | 19.5<br>(0.0 – 282.1) | 0.0<br>(0.0 – 35.8) | 0.0<br>(0.0 – 17.8) | 0.0<br>(0.0 – 4.1) |
| ]10,20]                 | 0.0<br>(0.0 – 13.5)                                                 | 22.9<br>(0.0 – 196.2) | 0.0<br>(0.0 – 14.3) | 0.0<br>(0.0 – 35.5) | 0.0<br>(0.0 – 4.1) |
| ]20,50]                 | 0.0<br>(0.0 – 8.6)                                                  | 0.0<br>(0.0 – 168.13) | 0.0<br>(0.0 – 4.3)  | 0.0<br>(0.0 – 10.9) | 0.0<br>(0.0 – 1.6) |
| ]50,100]                | 0.0<br>(0.0 – 4.0)                                                  | 0.0<br>(0.0 – 52.19)  | 0.0<br>(0.0 – 4.8)  | 0.0<br>(0.0 – 8.9)  | 0.0<br>(0.0 – 0.0) |

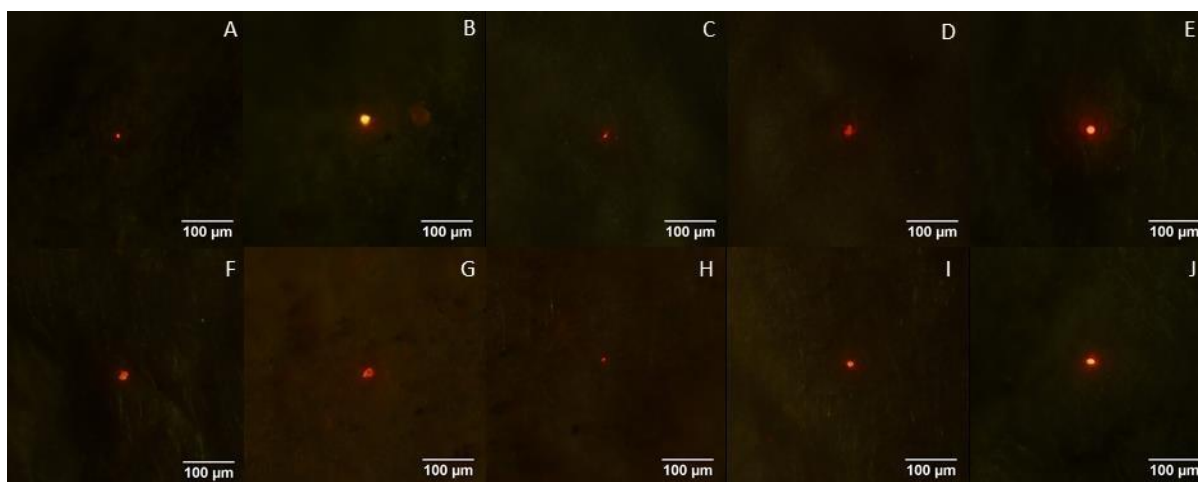

**Figure S1.** Suspected microplastics in tissues of companion animals (cats and dogs). Examples of microplastics stained with Nile Red and observed under the microscope found in fish: lungs (A, B), blood clots (C, D), kidney (E, F), ileum (G, H), and liver (I, J).

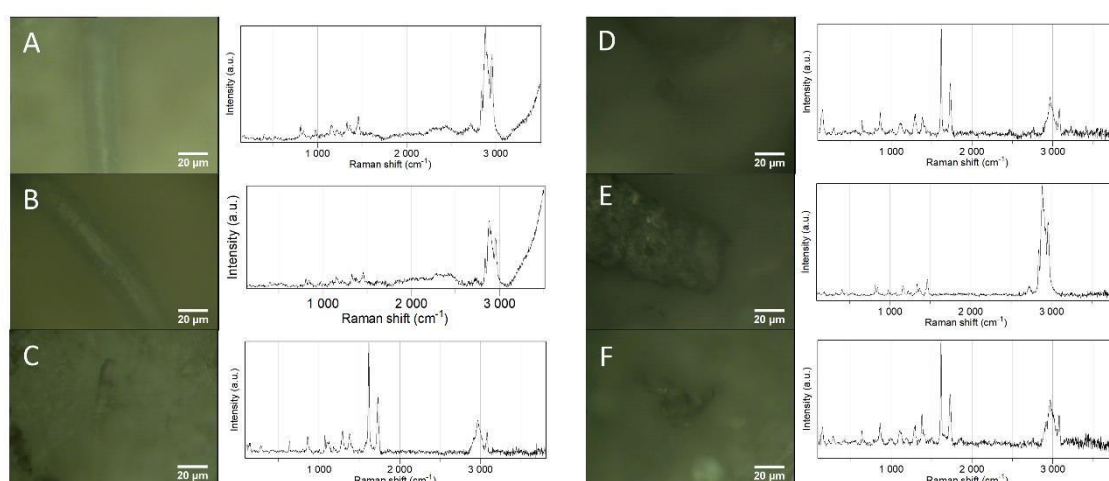

**Figure S2.** Raman spectra of microplastics found in filters of samples of internal tissues of different companion animal: A and B) polypropylene particle in cat liver; C) polyethylene terephthalate particle in cat ileum; D) polyethylene terephthalate in cat blood clot; E)

polypropylene particle in dog lung; F) polyethylene terephthalate particle in dog lung. Original colors.

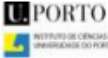

UNIVERSIDADE DO PORTO

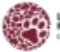

LABORATÓRIO DE  
PATOLOGIA VETERINÁRIA  
DA UNIVERSIDADE DO PORTO

Clinical necropsy request for teaching and research purposes

|                                                                                                                                                                                                                                                                                                                                    |                                                                                                                                                  |
|------------------------------------------------------------------------------------------------------------------------------------------------------------------------------------------------------------------------------------------------------------------------------------------------------------------------------------|--------------------------------------------------------------------------------------------------------------------------------------------------|
| <div>Sending institution</div> <div>E-mail: .....</div> <div>Tel: .....</div>                                                                                                                                                                                                                                                      | <div>Name: .....</div> <div>Species: .....</div> <div>Age: .....</div> <div>Breed: .....</div> <div>Gender: .....</div> <div>Weight: .....</div> |
| <div>Clinical history/Anamnesis:</div> <div>Known clinical history: .....</div> <div>Description of the clinical case/ lesions: .....</div> <div>Veterinary clinician: .....</div> <div>Animal tutor: .....</div> <div>Note: All necropsy procedures are free of charge and do not incur any cost to the requester or tutor.</div> |                                                                                                                                                  |

**Figure S3.** Blank copy of the necropsy request form, including informed consent sections, signed by both the pet owner and veterinary clinician.

**Table S7.** Sample coding.

| Code | Tissue | Species |
|------|--------|---------|------|--------|---------|------|--------|---------|------|--------|---------|------|--------|---------|
| A001 | Liver  | Cat     | A051 | Liver  | Cat     | A101 | Liver  | Dog     | A151 | Ileum  | Cat     | A201 | Kidney | Cat     |
| A002 | Lungs  | Cat     | A052 | Lungs  | Cat     | A102 | Lungs  | Dog     | A152 | Blood  | Cat     | A202 | Ileum  | Cat     |
| A003 | Ileum  | Cat     | A053 | Kidney | Cat     | A103 | Kidney | Dog     | A153 | Liver  | Cat     | A203 | Blood  | Cat     |
| A004 | Kidney | Cat     | A054 | Ileum  | Cat     | A104 | Ileum  | Dog     | A154 | Lungs  | Cat     | A204 | Liver  | Cat     |
| A005 | Blood  | Cat     | A055 | Blood  | Cat     | A105 | Blood  | Dog     | A155 | Kidney | Cat     | A205 | Lungs  | Cat     |
| A006 | Liver  | Cat     | A056 | Liver  | Dog     | A106 | Liver  | Dog     | A156 | Ileum  | Cat     | A206 | Kidney | Cat     |
| A007 | Lungs  | Cat     | A057 | Lungs  | Dog     | A107 | Lungs  | Dog     | A157 | Blood  | Cat     | A207 | Ileum  | Cat     |
| A008 | Ileum  | Cat     | A058 | Kidney | Dog     | A108 | Kidney | Dog     | A158 | Liver  | Dog     | A208 | Blood  | Cat     |
| A009 | Kidney | Cat     | A059 | Ileum  | Dog     | A109 | Ileum  | Dog     | A159 | Lungs  | Dog     | A209 | Liver  | Dog     |
| A010 | Blood  | Cat     | A060 | Blood  | Dog     | A110 | Blood  | Dog     | A160 | Kidney | Dog     | A210 | Lungs  | Dog     |
| A011 | Liver  | Cat     | A061 | Liver  | Dog     | A111 | Liver  | Cat     | A161 | Ileum  | Dog     | A211 | Kidney | Dog     |
| A012 | Lungs  | Cat     | A062 | Lungs  | Dog     | A112 | Lungs  | Cat     | A162 | Blood  | Dog     | A212 | Ileum  | Dog     |
| A013 | Kidney | Cat     | A063 | Kidney | Dog     | A113 | Kidney | Cat     | A163 | Liver  | Dog     | A213 | Blood  | Dog     |
| A014 | Ileum  | Cat     | A064 | Ileum  | Dog     | A114 | Ileum  | Cat     | A164 | Lungs  | Dog     | A214 | Liver  | Cat     |
| A015 | Blood  | Cat     | A065 | Blood  | Dog     | A115 | Blood  | Cat     | A165 | Kidney | Dog     | A215 | Lungs  | Cat     |
| A016 | Liver  | Cat     | A066 | Liver  | Dog     | A116 | Liver  | Dog     | A166 | Ileum  | Dog     | A216 | Kidney | Cat     |
| A017 | Lungs  | Cat     | A067 | Lungs  | Dog     | A117 | Lungs  | Dog     | A167 | Blood  | Dog     | A217 | Ileum  | Cat     |
| A018 | Kidney | Cat     | A068 | Kidney | Dog     | A118 | Kidney | Dog     | A168 | Liver  | Cat     | A218 | Liver  | Dog     |
| A019 | Ileum  | Cat     | A069 | Ileum  | Dog     | A119 | Ileum  | Dog     | A169 | Lungs  | Cat     | A219 | Lungs  | Dog     |
| A020 | Blood  | Cat     | A070 | Blood  | Dog     | A120 | Blood  | Dog     | A170 | Kidney | Cat     | A220 | Kidney | Dog     |
| A021 | Liver  | Dog     | A071 | Liver  | Cat     | A121 | Liver  | Dog     | A171 | Ileum  | Cat     | A221 | Ileum  | Dog     |
| A022 | Lungs  | Dog     | A072 | Lungs  | Cat     | A122 | Lungs  | Dog     | A172 | Blood  | Cat     | A222 | Blood  | Dog     |
| A023 | Kidney | Dog     | A073 | Kidney | Cat     | A123 | Kidney | Dog     | A173 | Liver  | Dog     | A223 | Liver  | Cat     |
| A024 | Ileum  | Dog     | A074 | Ileum  | Cat     | A124 | Ileum  | Dog     | A174 | Lungs  | Dog     | A224 | Lungs  | Cat     |
| A025 | Blood  | Dog     | A075 | Blood  | Cat     | A125 | Liver  | Cat     | A175 | Kidney | Dog     | A225 | Kidney | Cat     |
| A026 | Liver  | Dog     | A076 | Liver  | Cat     | A126 | Lungs  | Cat     | A176 | Ileum  | Dog     | A226 | Ileum  | Cat     |
| A027 | Lungs  | Dog     | A077 | Lungs  | Cat     | A127 | Kidney | Cat     | A177 | Blood  | Dog     | A227 | Blood  | Cat     |
| A028 | Kidney | Dog     | A078 | Kidney | Cat     | A128 | Ileum  | Cat     | A178 | Liver  | Cat     | A228 | Liver  | Dog     |
| A029 | Ileum  | Dog     | A079 | Ileum  | Cat     | -    |        |         | A179 | Lungs  | Cat     | A229 | Lungs  | Dog     |
| A030 | Blood  | Dog     | A080 | Blood  | Cat     | -    |        |         | A180 | Kidney | Cat     | A230 | Kidney | Dog     |
| A031 | Liver  | Cat     | A081 | Liver  | Dog     | -    |        |         | A181 | Ileum  | Cat     | A231 | Ileum  | Dog     |
| A032 | Lungs  | Cat     | A082 | Lungs  | Dog     | -    |        |         | A182 | Blood  | Cat     | A232 | Blood  | Dog     |
| A033 | Kidney | Cat     | A083 | Kidney | Dog     | A133 | Liver  | Cat     | -    |        |         | A233 | Liver  | Dog     |
| A034 | Ileum  | Cat     | A084 | Ileum  | Dog     | A134 | Lungs  | Cat     | A184 | Liver  | Dog     | A234 | Lungs  | Dog     |
| A035 | Blood  | Cat     | A085 | Blood  | Dog     | A135 | Kidney | Cat     | A185 | Lungs  | Dog     | A235 | Kidney | Dog     |
| A036 | Liver  | Cat     | A086 | Liver  | Cat     | A136 | Ileum  | Cat     | A186 | Kidney | Dog     | A236 | Ileum  | Dog     |
| A037 | Lungs  | Cat     | A087 | Lungs  | Cat     | A137 | Blood  | Cat     | A187 | Ileum  | Dog     | A237 | Blood  | Dog     |
| A038 | Kidney | Cat     | A088 | Kidney | Cat     | A138 | Liver  | Dog     | A188 | Blood  | Dog     | A238 | Liver  | Dog     |
| A039 | Ileum  | Cat     | A089 | Ileum  | Cat     | A139 | Lungs  | Dog     | A189 | Liver  | Dog     | A239 | Lungs  | Dog     |
| A040 | Blood  | Cat     | A090 | Blood  | Cat     | A140 | Kidney | Dog     | A190 | Lungs  | Dog     | A240 | Kidney | Dog     |

|      |        |     |      |        |     |      |        |     |      |        |     |      |        |     |
|------|--------|-----|------|--------|-----|------|--------|-----|------|--------|-----|------|--------|-----|
| A041 | Liver  | Cat | A091 | Liver  | Cat | A141 | Ileum  | Dog | A191 | Kidney | Dog | A241 | Ileum  | Dog |
| A042 | Lungs  | Cat | A092 | Lungs  | Cat | A142 | Blood  | Dog | A192 | Ileum  | Dog | A242 | Blood  | Dog |
| A043 | Kidney | Cat | A093 | Kidney | Cat | A143 | Liver  | Dog | A193 | Blood  | Dog | A243 | Liver  | Dog |
| A044 | Ileum  | Cat | A094 | Ileum  | Cat | A144 | Lungs  | Dog | A194 | Liver  | Dog | A244 | Lungs  | Dog |
| A045 | Blood  | Cat | A095 | Blood  | Cat | A145 | Kidney | Dog | A195 | Lungs  | Dog | A245 | Kidney | Dog |
| A046 | Liver  | Cat | A096 | Liver  | Dog | A146 | Ileum  | Dog | A196 | Kidney | Dog | A246 | Ileum  | Dog |
| A047 | Lungs  | Cat | A097 | Lungs  | Dog | A147 | Blood  | Dog | A197 | Ileum  | Dog | A247 | Blood  | Dog |
| A048 | Kidney | Cat | A098 | Kidney | Dog | A148 | Liver  | Cat | A198 | Blood  | Dog |      |        |     |
| A049 | Ileum  | Cat | A099 | Ileum  | Dog | A149 | Lungs  | Cat | A199 | Liver  | Cat |      |        |     |
| A050 | Blood  | Cat | A100 | Blood  | Dog | A150 | Kidney | Cat | A200 | Lungs  | Cat |      |        |     |

**Table S8.** Tissue weight (g) per sample code.

| Code | Tissue (g) |
|------|------------|------|------------|------|------------|------|------------|------|------------|
| A001 | 5.30       | A051 | 3.13       | A101 | 7.66       | A151 | 0.49       | A201 | 1.95       |
| A002 | 2.89       | A052 | 2.54       | A102 | 6.74       | A152 | 0.35       | A202 | 1.75       |
| A003 | 4.58       | A053 | 6.54       | A103 | 3.54       | A153 | 3.32       | A203 | 0.13       |
| A004 | 5.11       | A054 | 3.05       | A104 | 4.62       | A154 | 3.23       | A204 | 1.94       |
| A005 | 1.44       | A055 | 0.03       | A105 | 7.28       | A155 | 2.03       | A205 | 2.15       |
| A006 | 4.49       | A056 | 12.05      | A106 | 2.31       | A156 | 1.71       | A206 | 12.95      |
| A007 | 4.35       | A057 | 7.50       | A107 | 3.72       | A157 | 1.03       | A207 | 1.94       |
| A008 | 2.42       | A058 | 7.82       | A108 | 19.76      | A158 | 13.19      | A208 | 0.33       |
| A009 | 5.75       | A059 | 13.57      | A109 | 3.24       | A159 | 3.54       | A209 | 2.74       |
| A010 | 2.02       | A060 | 17.37      | A110 | 5.06       | A160 | 9.25       | A210 | 2.10       |
| A011 | 1.71       | A061 | 10.72      | A111 | 3.90       | A161 | 2.85       | A211 | 3.82       |
| A012 | 1.89       | A062 | 4.59       | A112 | 2.42       | A162 | 5.95       | A212 | 1.45       |
| A013 | 9.28       | A063 | 5.99       | A113 | 5.71       | A163 | 4.23       | A213 | 5.93       |
| A014 | 2.38       | A064 | 4.96       | A114 | 7.32       | A164 | 3.14       | A214 | 3.80       |
| A015 | 1.47       | A065 | 10.57      | A115 | 2.73       | A165 | 5.96       | A215 | 1.01       |
| A016 | 5.28       | A066 | 4.05       | A116 | 3.43       | A166 | 7.56       | A216 | 2.37       |
| A017 | 4.79       | A067 | 4.65       | A117 | 4.51       | A167 | 16.67      | A217 | 0.80       |
| A018 | 6.64       | A068 | 6.77       | A118 | 9.96       | A168 | 1.71       | A218 | 1.19       |
| A019 | 2.82       | A069 | 1.95       | A119 | 5.61       | A169 | 5.89       | A219 | 0.58       |
| A020 | 0.31       | A070 | 17.29      | A120 | 15.54      | A170 | 5.82       | A220 | 0.91       |
| A021 | 1.92       | A071 | 3.98       | A121 | 10.09      | A171 | 3.13       | A221 | 0.06       |
| A022 | 11.24      | A072 | 1.16       | A122 | 9.07       | A172 | 1.08       | A222 | 0.31       |
| A023 | 5.46       | A073 | 3.69       | A123 | 9.80       | A173 | 9.25       | A223 | 2.15       |
| A024 | 3.27       | A074 | 0.74       | A124 | 2.21       | A174 | 4.97       | A224 | 1.91       |
| A025 | 8.35       | A075 | 1.33       | A125 | 3.16       | A175 | 8.07       | A225 | 3.47       |
| A026 | 8.78       | A076 | 5.22       | A126 | 1.95       | A176 | 3.84       | A226 | 1.52       |
| A027 | 5.42       | A077 | 4.37       | A127 | 1.94       | A177 | 3.69       | A227 | 0.06       |
| A028 | 9.18       | A078 | 5.97       | A128 | 2.51       | A178 | 6.77       | A228 | 2.92       |
| A029 | 4.08       | A079 | 4.07       | -    | -          | A179 | 1.27       | A229 | 2.18       |
| A030 | 17.29      | A080 | 1.47       | -    | -          | A180 | 2.70       | A230 | 4.81       |
| A031 | 8.96       | A081 | 4.62       | -    | -          | A181 | 5.21       | A231 | 4.08       |
| A032 | 3.97       | A082 | 4.51       | -    | -          | A182 | 1.61       | A232 | 2.87       |
| A033 | 5.45       | A083 | 6.86       | A133 | 3.85       | -    | -          | A233 | 2.42       |

|      |       |      |       |      |      |      |      |      |      |
|------|-------|------|-------|------|------|------|------|------|------|
| A034 | 1.49  | A084 | 2.71  | A134 | 2.20 | A184 | 6.76 | A234 | 2.12 |
| A035 | 0.32  | A085 | 13.90 | A135 | 3.04 | A185 | 3.67 | A235 | 4.92 |
| A036 | 3.87  | A086 | 14.30 | A136 | 1.00 | A186 | 2.98 | A236 | 1.71 |
| A037 | 3.12  | A087 | 4.08  | A137 | 2.66 | A187 | 3.76 | A237 | 3.88 |
| A038 | 1.91  | A088 | 4.16  | A138 | 3.60 | A188 | 3.33 | A238 | 2.50 |
| A039 | 1.13  | A089 | 12.57 | A139 | 2.10 | A189 | 5.62 | A239 | 2.24 |
| A040 | 0.20  | A090 | 0.28  | A140 | 2.01 | A190 | 5.16 | A240 | 4.79 |
| A041 | 6.69  | A091 | 2.24  | A141 | 1.36 | A191 | 3.10 | A241 | 2.39 |
| A042 | 2.56  | A092 | 1.73  | A142 | 8.07 | A192 | 1.26 | A242 | 2.83 |
| A043 | 6.93  | A093 | 3.54  | A143 | 6.39 | A193 | 2.44 | A243 | 3.25 |
| A044 | 2.63  | A094 | 0.78  | A144 | 5.16 | A194 | 3.91 | A244 | 2.46 |
| A045 | 0.09  | A095 | 0.08  | A145 | 1.82 | A195 | 4.06 | A245 | 7.31 |
| A046 | 2.37  | A096 | 8.41  | A146 | 3.77 | A196 | 2.88 | A246 | 2.53 |
| A047 | 2.43  | A097 | 3.22  | A147 | 9.01 | A197 | 5.41 | A247 | 5.00 |
| A048 | 2.07  | A098 | 7.34  | A148 | 3.03 | A198 | 2.16 |      |      |
| A049 | 10.89 | A099 | 13.11 | A149 | 1.55 | A199 | 3.66 |      |      |
| A050 | 0.02  | A100 | 4.59  | A150 | 1.61 | A200 | 2.09 |      |      |

**Table S9.** Number of suspected microplastics per sample of animal tissues in 23% of the filter, after corresponding batch blank subtraction, and estimated full filter number (before normalization by sample wet weight).

| Sample |      | Counted in 23% |          |          |           | After blank subtraction |          |          |           | Total after blank subtraction |               |
|--------|------|----------------|----------|----------|-----------|-------------------------|----------|----------|-----------|-------------------------------|---------------|
| Batch  | Code | [1,10]         | [10, 20] | [20, 50] | [50, 100] | [1, 10]                 | [10, 20] | [20, 50] | [50, 100] | Total in 23%                  | Total in 100% |
| 1      | A001 | 1              | 1        | 3        | 0         | 0                       | 0        | 2        | 0         | 2                             | 9             |
| 1      | A002 | 1              | 0        | 0        | 0         | 0                       | 0        | 0        | 0         | 0                             | 0             |
| 1      | A003 | 1              | 2        | 0        | 0         | 0                       | 0        | 0        | 0         | 0                             | 0             |
| 1      | A004 | 5              | 1        | 2        | 0         | 0                       | 0        | 1        | 0         | 1                             | 4             |
| 1      | A005 | 0              | 2        | 0        | 0         | 0                       | 0        | 0        | 0         | 0                             | 0             |
| 1      | A006 | 0              | 0        | 0        | 0         | 0                       | 0        | 0        | 0         | 0                             | 0             |
| 1      | A007 | 0              | 0        | 1        | 0         | 0                       | 0        | 0        | 0         | 0                             | 0             |
| 1      | A008 | 7              | 0        | 1        | 0         | 0                       | 0        | 0        | 0         | 0                             | 0             |
| 1      | A009 | 1              | 0        | 0        | 0         | 0                       | 0        | 0        | 0         | 0                             | 0             |
| 1      | A010 | 1              | 0        | 0        | 0         | 0                       | 0        | 0        | 0         | 0                             | 0             |
| 1      | A011 | 1              | 0        | 0        | 0         | 0                       | 0        | 0        | 0         | 0                             | 0             |
| 1      | A012 | 7              | 0        | 0        | 0         | 0                       | 0        | 0        | 0         | 0                             | 0             |
| 1      | A013 | 0              | 0        | 0        | 0         | 0                       | 0        | 0        | 0         | 0                             | 0             |
| 1      | A014 | 0              | 0        | 0        | 0         | 0                       | 0        | 0        | 0         | 0                             | 0             |
| 1      | A015 | 0              | 0        | 1        | 0         | 0                       | 0        | 0        | 0         | 0                             | 0             |
| 1      | A016 | 0              | 0        | 0        | 0         | 0                       | 0        | 0        | 0         | 0                             | 0             |
| 1      | A017 | 14             | 3        | 2        | 0         | 4                       | 0        | 1        | 0         | 5                             | 22            |
| 1      | A018 | 1              | 1        | 0        | 0         | 0                       | 0        | 0        | 0         | 0                             | 0             |
| 1      | A019 | 16             | 1        | 0        | 0         | 6                       | 0        | 0        | 0         | 6                             | 26            |
| 1      | A020 | 1              | 0        | 0        | 1         | 0                       | 0        | 0        | 1         | 1                             | 4             |
| 1      | A021 | 1              | 0        | 1        | 0         | 0                       | 0        | 0        | 0         | 0                             | 0             |
| 1      | A022 | 5              | 0        | 0        | 0         | 0                       | 0        | 0        | 0         | 0                             | 0             |
| 1      | A023 | 20             | 0        | 0        | 0         | 10                      | 0        | 0        | 0         | 10                            | 43            |

|   |      |    |   |   |   |    |   |   |   |    |     |
|---|------|----|---|---|---|----|---|---|---|----|-----|
| 1 | A024 | 4  | 0 | 0 | 0 | 0  | 0 | 0 | 0 | 0  | 0   |
| 1 | A025 | 0  | 0 | 0 | 0 | 0  | 0 | 0 | 0 | 0  | 0   |
| 1 | A026 | 6  | 0 | 0 | 0 | 0  | 0 | 0 | 0 | 0  | 0   |
| 1 | A027 | 8  | 1 | 0 | 0 | 0  | 0 | 0 | 0 | 0  | 0   |
| 1 | A028 | 1  | 0 | 0 | 0 | 0  | 0 | 0 | 0 | 0  | 0   |
| 1 | A029 | 1  | 0 | 0 | 0 | 0  | 0 | 0 | 0 | 0  | 0   |
| 1 | A030 | 0  | 0 | 0 | 0 | 0  | 0 | 0 | 0 | 0  | 0   |
| 1 | A031 | 0  | 0 | 0 | 0 | 0  | 0 | 0 | 0 | 0  | 0   |
| 1 | A032 | 1  | 1 | 0 | 0 | 0  | 0 | 0 | 0 | 0  | 0   |
| 1 | A033 | 1  | 0 | 0 | 0 | 0  | 0 | 0 | 0 | 0  | 0   |
| 1 | A034 | 0  | 0 | 0 | 0 | 0  | 0 | 0 | 0 | 0  | 0   |
| 1 | A035 | 0  | 0 | 0 | 0 | 0  | 0 | 0 | 0 | 0  | 0   |
| 1 | A036 | 0  | 0 | 0 | 0 | 0  | 0 | 0 | 0 | 0  | 0   |
| 1 | A037 | 1  | 0 | 1 | 0 | 0  | 0 | 0 | 0 | 0  | 0   |
| 1 | A038 | 0  | 3 | 0 | 0 | 0  | 0 | 0 | 0 | 0  | 0   |
| 1 | A039 | 0  | 0 | 0 | 0 | 0  | 0 | 0 | 0 | 0  | 0   |
| 1 | A040 | 1  | 1 | 0 | 0 | 0  | 0 | 0 | 0 | 0  | 0   |
| 1 | A041 | 3  | 0 | 0 | 0 | 0  | 0 | 0 | 0 | 0  | 0   |
| 1 | A042 | 1  | 0 | 0 | 0 | 0  | 0 | 0 | 0 | 0  | 0   |
| 1 | A043 | 0  | 0 | 0 | 0 | 0  | 0 | 0 | 0 | 0  | 0   |
| 1 | A044 | 2  | 0 | 0 | 0 | 0  | 0 | 0 | 0 | 0  | 0   |
| 1 | A045 | 0  | 0 | 0 | 0 | 0  | 0 | 0 | 0 | 0  | 0   |
| 1 | A046 | 3  | 0 | 0 | 0 | 0  | 0 | 0 | 0 | 0  | 0   |
| 1 | A047 | 2  | 0 | 0 | 0 | 0  | 0 | 0 | 0 | 0  | 0   |
| 1 | A048 | 13 | 0 | 0 | 0 | 3  | 0 | 0 | 0 | 3  | 13  |
| 1 | A049 | 44 | 0 | 0 | 0 | 34 | 0 | 0 | 0 | 34 | 148 |
| 1 | A050 | 0  | 0 | 0 | 0 | 0  | 0 | 0 | 0 | 0  | 0   |
| 1 | A051 | 1  | 0 | 0 | 0 | 0  | 0 | 0 | 0 | 0  | 0   |
| 1 | A052 | 4  | 0 | 2 | 0 | 0  | 0 | 1 | 0 | 1  | 4   |
| 1 | A053 | 0  | 0 | 0 | 0 | 0  | 0 | 0 | 0 | 0  | 0   |
| 1 | A054 | 0  | 0 | 0 | 0 | 0  | 0 | 0 | 0 | 0  | 0   |
| 1 | A055 | 0  | 1 | 0 | 0 | 0  | 0 | 0 | 0 | 0  | 0   |
| 1 | A056 | 2  | 0 | 0 | 0 | 0  | 0 | 0 | 0 | 0  | 0   |
| 1 | A057 | 0  | 0 | 0 | 0 | 0  | 0 | 0 | 0 | 0  | 0   |
| 1 | A058 | 2  | 5 | 2 | 0 | 0  | 1 | 1 | 0 | 2  | 9   |
| 1 | A059 | 0  | 2 | 1 | 1 | 0  | 0 | 0 | 1 | 1  | 4   |
| 1 | A060 | 0  | 0 | 0 | 0 | 0  | 0 | 0 | 0 | 0  | 0   |
| 1 | A061 | 0  | 0 | 0 | 0 | 0  | 0 | 0 | 0 | 0  | 0   |
| 1 | A062 | 0  | 0 | 0 | 0 | 0  | 0 | 0 | 0 | 0  | 0   |
| 1 | A063 | 0  | 0 | 0 | 0 | 0  | 0 | 0 | 0 | 0  | 0   |
| 1 | A064 | 0  | 0 | 0 | 0 | 0  | 0 | 0 | 0 | 0  | 0   |
| 1 | A065 | 0  | 0 | 0 | 0 | 0  | 0 | 0 | 0 | 0  | 0   |
| 1 | A066 | 0  | 0 | 0 | 0 | 0  | 0 | 0 | 0 | 0  | 0   |
| 1 | A067 | 0  | 0 | 0 | 0 | 0  | 0 | 0 | 0 | 0  | 0   |
| 1 | A068 | 0  | 0 | 0 | 0 | 0  | 0 | 0 | 0 | 0  | 0   |
| 1 | A069 | 0  | 0 | 0 | 1 | 0  | 0 | 0 | 1 | 1  | 4   |
| 1 | A070 | 0  | 0 | 0 | 0 | 0  | 0 | 0 | 0 | 0  | 0   |
| 1 | A071 | 1  | 0 | 0 | 0 | 0  | 0 | 0 | 0 | 0  | 0   |

|   |      |   |   |   |   |   |   |   |   |   |   |
|---|------|---|---|---|---|---|---|---|---|---|---|
| 1 | A072 | 2 | 1 | 2 | 0 | 0 | 0 | 1 | 0 | 1 | 4 |
| 1 | A073 | 1 | 2 | 1 | 0 | 0 | 0 | 0 | 0 | 0 | 0 |
| 1 | A074 | 1 | 1 | 0 | 0 | 0 | 0 | 0 | 0 | 0 | 0 |
| 1 | A075 | 0 | 0 | 0 | 0 | 0 | 0 | 0 | 0 | 0 | 0 |
| 1 | A076 | 0 | 0 | 0 | 0 | 0 | 0 | 0 | 0 | 0 | 0 |
| 1 | A077 | 2 | 0 | 0 | 0 | 0 | 0 | 0 | 0 | 0 | 0 |
| 1 | A078 | 0 | 0 | 0 | 0 | 0 | 0 | 0 | 0 | 0 | 0 |
| 1 | A079 | 1 | 0 | 0 | 2 | 0 | 0 | 0 | 2 | 2 | 9 |
| 1 | A080 | 0 | 0 | 0 | 0 | 0 | 0 | 0 | 0 | 0 | 0 |
| 1 | A081 | 0 | 0 | 0 | 0 | 0 | 0 | 0 | 0 | 0 | 0 |
| 1 | A082 | 7 | 0 | 0 | 0 | 0 | 0 | 0 | 0 | 0 | 0 |
| 1 | A083 | 0 | 0 | 0 | 0 | 0 | 0 | 0 | 0 | 0 | 0 |
| 1 | A084 | 1 | 1 | 0 | 0 | 0 | 0 | 0 | 0 | 0 | 0 |
| 1 | A085 | 0 | 0 | 0 | 0 | 0 | 0 | 0 | 0 | 0 | 0 |
| 1 | A086 | 1 | 0 | 0 | 0 | 0 | 0 | 0 | 0 | 0 | 0 |
| 1 | A087 | 1 | 0 | 0 | 0 | 0 | 0 | 0 | 0 | 0 | 0 |
| 1 | A088 | 0 | 0 | 1 | 0 | 0 | 0 | 0 | 0 | 0 | 0 |
| 1 | A089 | 1 | 0 | 0 | 0 | 0 | 0 | 0 | 0 | 0 | 0 |
| 1 | A090 | 0 | 0 | 0 | 0 | 0 | 0 | 0 | 0 | 0 | 0 |
| 1 | A091 | 0 | 0 | 0 | 0 | 0 | 0 | 0 | 0 | 0 | 0 |
| 1 | A092 | 5 | 1 | 0 | 0 | 0 | 0 | 0 | 0 | 0 | 0 |
| 1 | A093 | 4 | 0 | 0 | 0 | 0 | 0 | 0 | 0 | 0 | 0 |
| 1 | A094 | 1 | 0 | 0 | 0 | 0 | 0 | 0 | 0 | 0 | 0 |
| 1 | A095 | 4 | 3 | 2 | 1 | 0 | 0 | 1 | 1 | 2 | 9 |
| 1 | A096 | 0 | 0 | 0 | 0 | 0 | 0 | 0 | 0 | 0 | 0 |
| 1 | A097 | 0 | 0 | 0 | 0 | 0 | 0 | 0 | 0 | 0 | 0 |
| 1 | A098 | 0 | 0 | 0 | 0 | 0 | 0 | 0 | 0 | 0 | 0 |
| 1 | A099 | 0 | 0 | 0 | 0 | 0 | 0 | 0 | 0 | 0 | 0 |
| 1 | A100 | 0 | 0 | 0 | 0 | 0 | 0 | 0 | 0 | 0 | 0 |
| 1 | A101 | 0 | 0 | 0 | 0 | 0 | 0 | 0 | 0 | 0 | 0 |
| 1 | A102 | 0 | 0 | 0 | 0 | 0 | 0 | 0 | 0 | 0 | 0 |
| 1 | A103 | 0 | 0 | 0 | 0 | 0 | 0 | 0 | 0 | 0 | 0 |
| 1 | A104 | 0 | 0 | 0 | 0 | 0 | 0 | 0 | 0 | 0 | 0 |
| 1 | A105 | 0 | 0 | 0 | 0 | 0 | 0 | 0 | 0 | 0 | 0 |
| 1 | A106 | 0 | 0 | 0 | 0 | 0 | 0 | 0 | 0 | 0 | 0 |
| 1 | A107 | 0 | 0 | 0 | 0 | 0 | 0 | 0 | 0 | 0 | 0 |
| 1 | A108 | 1 | 0 | 0 | 0 | 0 | 0 | 0 | 0 | 0 | 0 |
| 1 | A109 | 0 | 0 | 0 | 0 | 0 | 0 | 0 | 0 | 0 | 0 |
| 1 | A110 | 0 | 0 | 0 | 0 | 0 | 0 | 0 | 0 | 0 | 0 |
| 2 | A111 | 1 | 1 | 0 | 0 | 0 | 1 | 0 | 0 | 1 | 4 |
| 2 | A112 | 3 | 0 | 0 | 0 | 2 | 0 | 0 | 0 | 2 | 9 |
| 2 | A113 | 0 | 0 | 0 | 1 | 0 | 0 | 0 | 1 | 1 | 4 |
| 2 | A114 | 0 | 0 | 0 | 0 | 0 | 0 | 0 | 0 | 0 | 0 |
| 2 | A115 | 2 | 1 | 0 | 0 | 1 | 1 | 0 | 0 | 2 | 9 |
| 2 | A116 | 0 | 0 | 0 | 0 | 0 | 0 | 0 | 0 | 0 | 0 |
| 2 | A117 | 0 | 0 | 0 | 0 | 0 | 0 | 0 | 0 | 0 | 0 |
| 2 | A118 | 0 | 0 | 0 | 0 | 0 | 0 | 0 | 0 | 0 | 0 |
| 2 | A119 | 0 | 0 | 0 | 0 | 0 | 0 | 0 | 0 | 0 | 0 |

|   |      |    |    |   |   |    |    |   |   |    |     |
|---|------|----|----|---|---|----|----|---|---|----|-----|
| 2 | A120 | 0  | 0  | 0 | 0 | 0  | 0  | 0 | 0 | 0  | 0   |
| 2 | A121 | 0  | 0  | 0 | 0 | 0  | 0  | 0 | 0 | 0  | 0   |
| 2 | A122 | 3  | 2  | 0 | 0 | 2  | 2  | 0 | 0 | 4  | 17  |
| 2 | A123 | 0  | 0  | 0 | 0 | 0  | 0  | 0 | 0 | 0  | 0   |
| 2 | A124 | 0  | 0  | 1 | 0 | 0  | 0  | 1 | 0 | 1  | 4   |
| 2 | A125 | 4  | 1  | 0 | 0 | 3  | 1  | 0 | 0 | 4  | 17  |
| 2 | A126 | 1  | 0  | 0 | 0 | 0  | 0  | 0 | 0 | 0  | 0   |
| 2 | A127 | 2  | 1  | 0 | 0 | 1  | 1  | 0 | 0 | 2  | 9   |
| 2 | A128 | 0  | 0  | 0 | 0 | 0  | 0  | 0 | 0 | 0  | 0   |
| 2 | A129 | -  | -  | - | - | -  | -  | - | - | -  | -   |
| 2 | A130 | -  | -  | - | - | -  | -  | - | - | -  | -   |
| 2 | A131 | -  | -  | - | - | -  | -  | - | - | -  | -   |
| 2 | A132 | -  | -  | - | - | -  | -  | - | - | -  | -   |
| 2 | A133 | 0  | 0  | 0 | 0 | 0  | 0  | 0 | 0 | 0  | 0   |
| 2 | A134 | 3  | 0  | 0 | 0 | 2  | 0  | 0 | 0 | 2  | 9   |
| 2 | A135 | 0  | 2  | 0 | 0 | 0  | 2  | 0 | 0 | 2  | 9   |
| 2 | A136 | 1  | 0  | 0 | 0 | 0  | 0  | 0 | 0 | 0  | 0   |
| 2 | A137 | 0  | 0  | 0 | 0 | 0  | 0  | 0 | 0 | 0  | 0   |
| 2 | A138 | 0  | 1  | 0 | 0 | 0  | 1  | 0 | 0 | 1  | 4   |
| 2 | A139 | 0  | 4  | 1 | 0 | 0  | 4  | 1 | 0 | 5  | 22  |
| 2 | A140 | 1  | 1  | 0 | 1 | 0  | 1  | 0 | 1 | 2  | 9   |
| 2 | A141 | 5  | 1  | 1 | 0 | 4  | 1  | 1 | 0 | 6  | 26  |
| 2 | A142 | 1  | 1  | 0 | 0 | 0  | 1  | 0 | 0 | 1  | 4   |
| 2 | A143 | 0  | 0  | 0 | 0 | 0  | 0  | 0 | 0 | 0  | 0   |
| 2 | A144 | 2  | 2  | 0 | 0 | 1  | 2  | 0 | 0 | 3  | 13  |
| 2 | A145 | 16 | 6  | 0 | 0 | 15 | 6  | 0 | 0 | 21 | 91  |
| 2 | A146 | 1  | 0  | 0 | 0 | 0  | 0  | 0 | 0 | 0  | 0   |
| 2 | A147 | 0  | 0  | 0 | 0 | 0  | 0  | 0 | 0 | 0  | 0   |
| 2 | A148 | 3  | 0  | 0 | 0 | 2  | 0  | 0 | 0 | 2  | 9   |
| 2 | A149 | 3  | 1  | 0 | 0 | 2  | 1  | 0 | 0 | 3  | 13  |
| 2 | A150 | 6  | 3  | 0 | 0 | 5  | 3  | 0 | 0 | 8  | 35  |
| 2 | A151 | 3  | 4  | 1 | 1 | 2  | 4  | 1 | 1 | 8  | 35  |
| 2 | A152 | 24 | 16 | 4 | 0 | 23 | 16 | 4 | 0 | 43 | 187 |
| 2 | A153 | 0  | 1  | 0 | 0 | 0  | 1  | 0 | 0 | 1  | 4   |
| 2 | A154 | 1  | 1  | 0 | 0 | 0  | 1  | 0 | 0 | 1  | 4   |
| 2 | A155 | 2  | 3  | 2 | 0 | 1  | 3  | 2 | 0 | 6  | 26  |
| 2 | A156 | 0  | 0  | 0 | 0 | 0  | 0  | 0 | 0 | 0  | 0   |
| 2 | A157 | 0  | 0  | 0 | 0 | 0  | 0  | 0 | 0 | 0  | 0   |
| 2 | A158 | 0  | 0  | 0 | 0 | 0  | 0  | 0 | 0 | 0  | 0   |
| 2 | A159 | 7  | 11 | 3 | 0 | 6  | 11 | 3 | 0 | 20 | 87  |
| 2 | A160 | 0  | 1  | 0 | 0 | 0  | 1  | 0 | 0 | 1  | 4   |
| 2 | A161 | 0  | 0  | 0 | 0 | 0  | 0  | 0 | 0 | 0  | 0   |
| 2 | A162 | 0  | 0  | 0 | 0 | 0  | 0  | 0 | 0 | 0  | 0   |
| 2 | A163 | 0  | 0  | 0 | 0 | 0  | 0  | 0 | 0 | 0  | 0   |
| 2 | A164 | 4  | 2  | 1 | 0 | 3  | 2  | 1 | 0 | 6  | 26  |
| 2 | A165 | 1  | 0  | 0 | 0 | 0  | 0  | 0 | 0 | 0  | 0   |
| 2 | A166 | 0  | 0  | 0 | 0 | 0  | 0  | 0 | 0 | 0  | 0   |
| 2 | A167 | 0  | 0  | 0 | 0 | 0  | 0  | 0 | 0 | 0  | 0   |

|   |      |    |   |   |   |    |   |   |   |    |     |
|---|------|----|---|---|---|----|---|---|---|----|-----|
| 2 | A168 | 1  | 1 | 0 | 0 | 0  | 1 | 0 | 0 | 1  | 4   |
| 2 | A169 | 2  | 3 | 1 | 0 | 1  | 3 | 1 | 0 | 5  | 22  |
| 2 | A170 | 1  | 5 | 1 | 0 | 0  | 5 | 1 | 0 | 6  | 26  |
| 2 | A171 | 1  | 0 | 0 | 0 | 0  | 0 | 0 | 0 | 0  | 0   |
| 2 | A172 | 0  | 0 | 0 | 0 | 0  | 0 | 0 | 0 | 0  | 0   |
| 2 | A173 | 0  | 0 | 0 | 0 | 0  | 0 | 0 | 0 | 0  | 0   |
| 2 | A174 | 1  | 1 | 0 | 0 | 0  | 1 | 0 | 0 | 1  | 4   |
| 2 | A175 | 2  | 2 | 1 | 0 | 1  | 2 | 1 | 0 | 4  | 17  |
| 2 | A176 | 0  | 0 | 1 | 0 | 0  | 0 | 1 | 0 | 1  | 4   |
| 2 | A177 | 0  | 0 | 0 | 0 | 0  | 0 | 0 | 0 | 0  | 0   |
| 2 | A178 | 0  | 4 | 1 | 0 | 0  | 4 | 1 | 0 | 5  | 22  |
| 2 | A179 | 7  | 0 | 0 | 0 | 6  | 0 | 0 | 0 | 6  | 26  |
| 2 | A180 | 1  | 5 | 2 | 0 | 0  | 5 | 2 | 0 | 7  | 30  |
| 2 | A181 | 0  | 0 | 0 | 0 | 0  | 0 | 0 | 0 | 0  | 0   |
| 2 | A182 | 1  | 0 | 0 | 0 | 0  | 0 | 0 | 0 | 0  | 0   |
| 2 | A183 | -  | - | - | - | -  | - | - | - | -  | -   |
| 2 | A184 | 0  | 0 | 0 | 0 | 0  | 0 | 0 | 0 | 0  | 0   |
| 2 | A185 | 3  | 0 | 0 | 0 | 2  | 0 | 0 | 0 | 2  | 9   |
| 2 | A186 | 1  | 0 | 0 | 0 | 0  | 0 | 0 | 0 | 0  | 0   |
| 2 | A187 | 0  | 0 | 0 | 0 | 0  | 0 | 0 | 0 | 0  | 0   |
| 2 | A188 | 0  | 0 | 0 | 0 | 0  | 0 | 0 | 0 | 0  | 0   |
| 2 | A189 | 2  | 0 | 1 | 0 | 1  | 0 | 1 | 0 | 2  | 9   |
| 2 | A190 | 22 | 2 | 0 | 0 | 21 | 2 | 0 | 0 | 23 | 100 |
| 2 | A191 | 2  | 0 | 0 | 0 | 1  | 0 | 0 | 0 | 1  | 4   |
| 2 | A192 | 1  | 2 | 0 | 0 | 0  | 2 | 0 | 0 | 2  | 9   |
| 2 | A193 | 1  | 0 | 0 | 0 | 0  | 0 | 0 | 0 | 0  | 0   |
| 2 | A194 | 2  | 0 | 0 | 0 | 1  | 0 | 0 | 0 | 1  | 4   |
| 2 | A195 | 0  | 0 | 0 | 0 | 0  | 0 | 0 | 0 | 0  | 0   |
| 2 | A196 | 2  | 1 | 0 | 0 | 1  | 1 | 0 | 0 | 2  | 9   |
| 2 | A197 | 0  | 0 | 0 | 0 | 0  | 0 | 0 | 0 | 0  | 0   |
| 2 | A198 | 0  | 0 | 0 | 0 | 0  | 0 | 0 | 0 | 0  | 0   |
| 2 | A199 | 1  | 0 | 0 | 0 | 0  | 0 | 0 | 0 | 0  | 0   |
| 2 | A200 | 1  | 0 | 0 | 0 | 0  | 0 | 0 | 0 | 0  | 0   |
| 2 | A201 | 0  | 0 | 0 | 0 | 0  | 0 | 0 | 0 | 0  | 0   |
| 2 | A202 | 0  | 1 | 0 | 0 | 0  | 1 | 0 | 0 | 1  | 4   |
| 2 | A203 | 2  | 3 | 5 | 0 | 1  | 3 | 5 | 0 | 9  | 39  |
| 2 | A204 | 0  | 1 | 0 | 0 | 0  | 1 | 0 | 0 | 1  | 4   |
| 2 | A205 | 3  | 2 | 0 | 2 | 2  | 2 | 0 | 2 | 6  | 26  |
| 2 | A206 | 1  | 0 | 0 | 1 | 0  | 0 | 0 | 1 | 1  | 4   |
| 2 | A207 | 2  | 0 | 0 | 0 | 1  | 0 | 0 | 0 | 1  | 4   |
| 2 | A208 | 2  | 1 | 0 | 0 | 1  | 1 | 0 | 0 | 2  | 9   |
| 2 | A209 | 0  | 0 | 0 | 0 | 0  | 0 | 0 | 0 | 0  | 0   |
| 2 | A210 | 1  | 0 | 0 | 0 | 0  | 0 | 0 | 0 | 0  | 0   |
| 2 | A211 | 0  | 0 | 0 | 0 | 0  | 0 | 0 | 0 | 0  | 0   |
| 2 | A212 | 4  | 0 | 0 | 0 | 3  | 0 | 0 | 0 | 3  | 13  |
| 2 | A213 | 0  | 0 | 0 | 0 | 0  | 0 | 0 | 0 | 0  | 0   |
| 2 | A214 | 0  | 3 | 2 | 0 | 0  | 3 | 2 | 0 | 5  | 22  |
| 2 | A215 | 0  | 3 | 2 | 0 | 0  | 3 | 2 | 0 | 5  | 22  |

|   |      |   |   |   |   |   |   |   |   |   |    |
|---|------|---|---|---|---|---|---|---|---|---|----|
| 2 | A216 | 1 | 1 | 0 | 0 | 0 | 1 | 0 | 0 | 1 | 4  |
| 2 | A217 | 0 | 0 | 2 | 0 | 0 | 0 | 2 | 0 | 2 | 9  |
| 2 | A218 | 2 | 1 | 0 | 0 | 1 | 1 | 0 | 0 | 2 | 9  |
| 2 | A219 | 0 | 0 | 0 | 0 | 0 | 0 | 0 | 0 | 0 | 0  |
| 2 | A220 | 0 | 0 | 0 | 1 | 0 | 0 | 0 | 1 | 1 | 4  |
| 2 | A221 | 0 | 0 | 0 | 0 | 0 | 0 | 0 | 0 | 0 | 0  |
| 2 | A222 | 0 | 0 | 0 | 0 | 0 | 0 | 0 | 0 | 0 | 0  |
| 2 | A223 | 1 | 2 | 0 | 0 | 0 | 2 | 0 | 0 | 2 | 9  |
| 2 | A224 | 0 | 0 | 0 | 0 | 0 | 0 | 0 | 0 | 0 | 0  |
| 2 | A225 | 0 | 0 | 0 | 0 | 0 | 0 | 0 | 0 | 0 | 0  |
| 2 | A226 | 0 | 0 | 0 | 0 | 0 | 0 | 0 | 0 | 0 | 0  |
| 2 | A227 | 0 | 1 | 0 | 0 | 0 | 1 | 0 | 0 | 1 | 4  |
| 2 | A228 | 0 | 0 | 0 | 0 | 0 | 0 | 0 | 0 | 0 | 0  |
| 2 | A229 | 0 | 0 | 0 | 0 | 0 | 0 | 0 | 0 | 0 | 0  |
| 2 | A230 | 0 | 2 | 1 | 0 | 0 | 2 | 1 | 0 | 3 | 13 |
| 2 | A231 | 0 | 0 | 1 | 0 | 0 | 0 | 1 | 0 | 1 | 4  |
| 2 | A232 | 1 | 0 | 0 | 0 | 0 | 0 | 0 | 0 | 0 | 0  |
| 2 | A233 | 0 | 0 | 0 | 0 | 0 | 0 | 0 | 0 | 0 | 0  |
| 2 | A234 | 0 | 0 | 0 | 0 | 0 | 0 | 0 | 0 | 0 | 0  |
| 2 | A235 | 0 | 1 | 0 | 0 | 0 | 1 | 0 | 0 | 1 | 4  |
| 2 | A236 | 0 | 0 | 1 | 0 | 0 | 0 | 1 | 0 | 1 | 4  |
| 2 | A237 | 0 | 0 | 0 | 0 | 0 | 0 | 0 | 0 | 0 | 0  |
| 2 | A238 | 0 | 0 | 0 | 0 | 0 | 0 | 0 | 0 | 0 | 0  |
| 2 | A239 | 1 | 0 | 0 | 0 | 0 | 0 | 0 | 0 | 0 | 0  |
| 2 | A240 | 0 | 0 | 0 | 0 | 0 | 0 | 0 | 0 | 0 | 0  |
| 2 | A241 | 0 | 1 | 0 | 0 | 0 | 1 | 0 | 0 | 1 | 4  |
| 2 | A242 | 0 | 0 | 0 | 0 | 0 | 0 | 0 | 0 | 0 | 0  |
| 2 | A243 | 0 | 0 | 0 | 0 | 0 | 0 | 0 | 0 | 0 | 0  |
| 2 | A244 | 0 | 0 | 0 | 0 | 0 | 0 | 0 | 0 | 0 | 0  |
| 2 | A245 | 0 | 0 | 0 | 0 | 0 | 0 | 0 | 0 | 0 | 0  |
| 2 | A246 | 0 | 0 | 0 | 0 | 0 | 0 | 0 | 0 | 0 | 0  |
| 2 | A247 | 1 | 0 | 0 | 0 | 0 | 0 | 0 | 0 | 0 | 0  |

## Particle library

### Batch 1

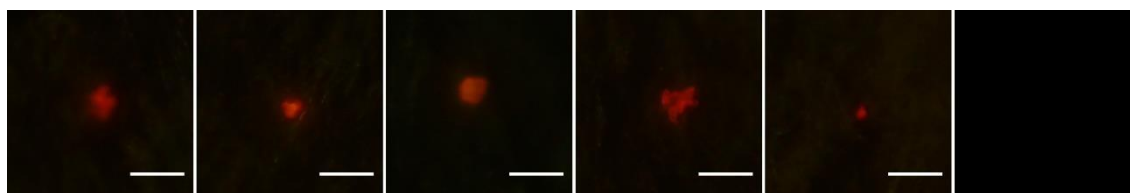

**Figure S4.** Fluorescent particles (suspected microplastics), with a 50  $\mu\text{m}$  scale, observed in 23% of the filter (without blank subtraction) of A001.

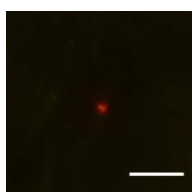

**Figure S5.** Fluorescent particles (suspected microplastics), with a 50  $\mu\text{m}$  scale, observed in 23% of the filter (without blank subtraction) of A002.

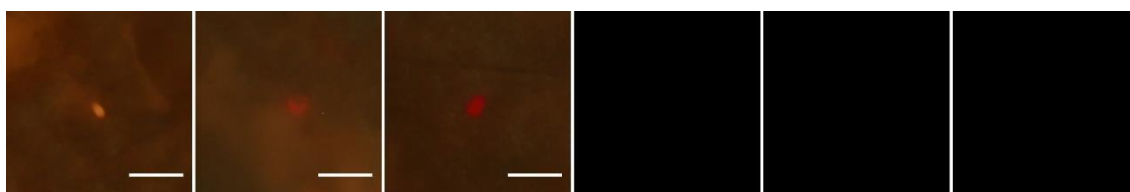

**Figure S6.** Fluorescent particles (suspected microplastics), with a 50  $\mu\text{m}$  scale, observed in 23% of the filter (without blank subtraction) of A003.

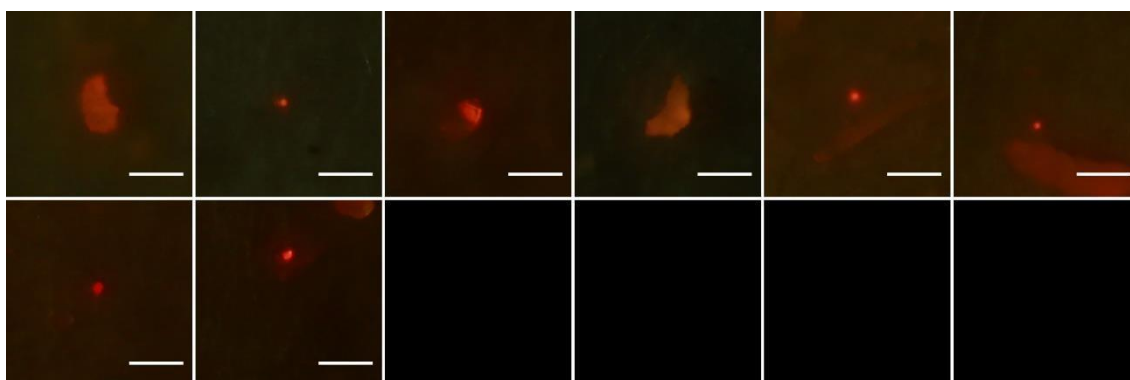

**Figure S7.** Fluorescent particles (suspected microplastics), with a 50  $\mu\text{m}$  scale, observed in 23% of the filter (without blank subtraction) of A004.

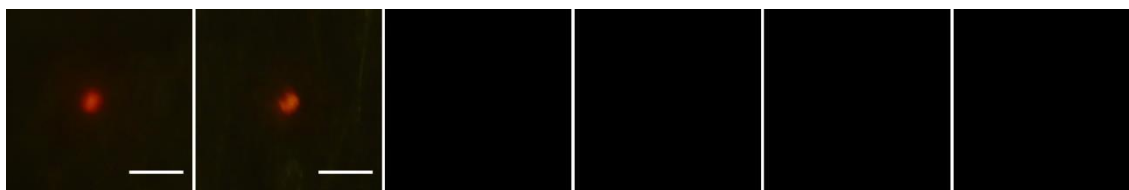

**Figure S8.** Fluorescent particles (suspected microplastics), with a 50  $\mu\text{m}$  scale, observed in 23% of the filter (without blank subtraction) of A005.

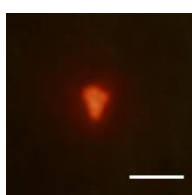

**Figure S9.** Fluorescent particles (suspected microplastics), with a 50  $\mu\text{m}$  scale, observed in 23% of the filter (without blank subtraction) of A007.

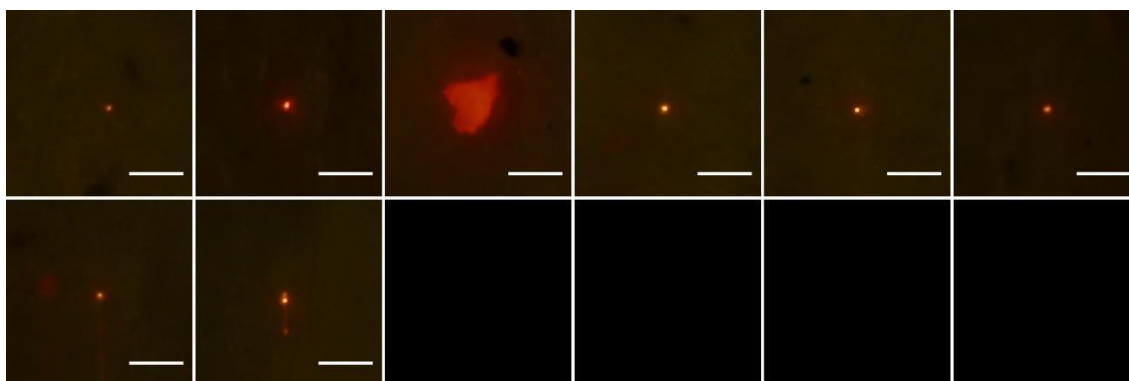

**Figure S10.** Fluorescent particles (suspected microplastics), with a 50  $\mu\text{m}$  scale, observed in 23% of the filter (without blank subtraction) of A008.

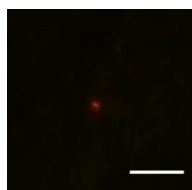

**Figure S11.** Fluorescent particles (suspected microplastics), with a 50  $\mu\text{m}$  scale, observed in 23% of the filter (without blank subtraction) of A009.

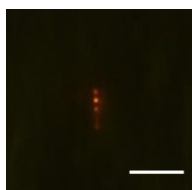

**Figure S12.** Fluorescent particles (suspected microplastics), with a 50  $\mu\text{m}$  scale, observed in 23% of the filter (without blank subtraction) of A010.

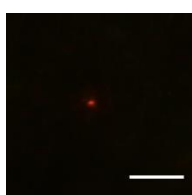

**Figure S13.** Fluorescent particles (suspected microplastics), with a 50  $\mu\text{m}$  scale, observed in 23% of the filter (without blank subtraction) of A011.

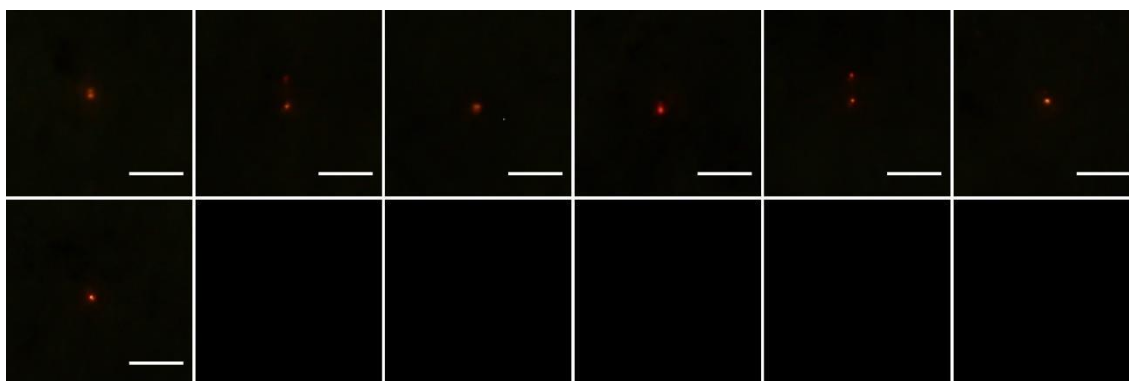

**Figure S14.** Fluorescent particles (suspected microplastics), with a 50  $\mu\text{m}$  scale, observed in 23% of the filter (without blank subtraction) of A012.

**Figure S15.** Fluorescent particles (suspected microplastics), with a 50  $\mu\text{m}$  scale, observed in 23% of the filter (without blank subtraction) of A015.

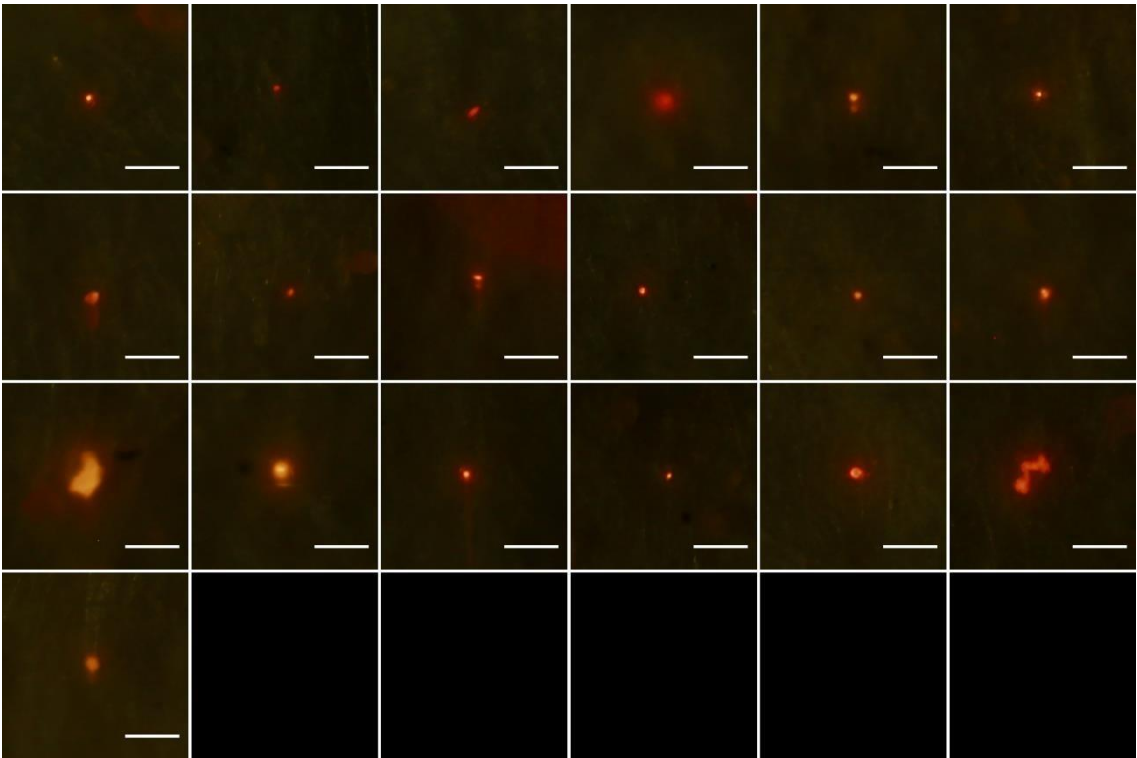

**Figure S16.** Fluorescent particles (suspected microplastics), with a 50  $\mu\text{m}$  scale, observed in 23% of the filter (without blank subtraction) of A017.

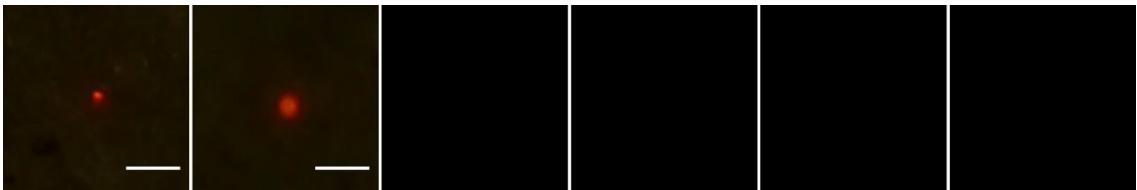

**Figure S17.** Fluorescent particles (suspected microplastics), with a 50  $\mu\text{m}$  scale, observed in 23% of the filter (without blank subtraction) of A018.

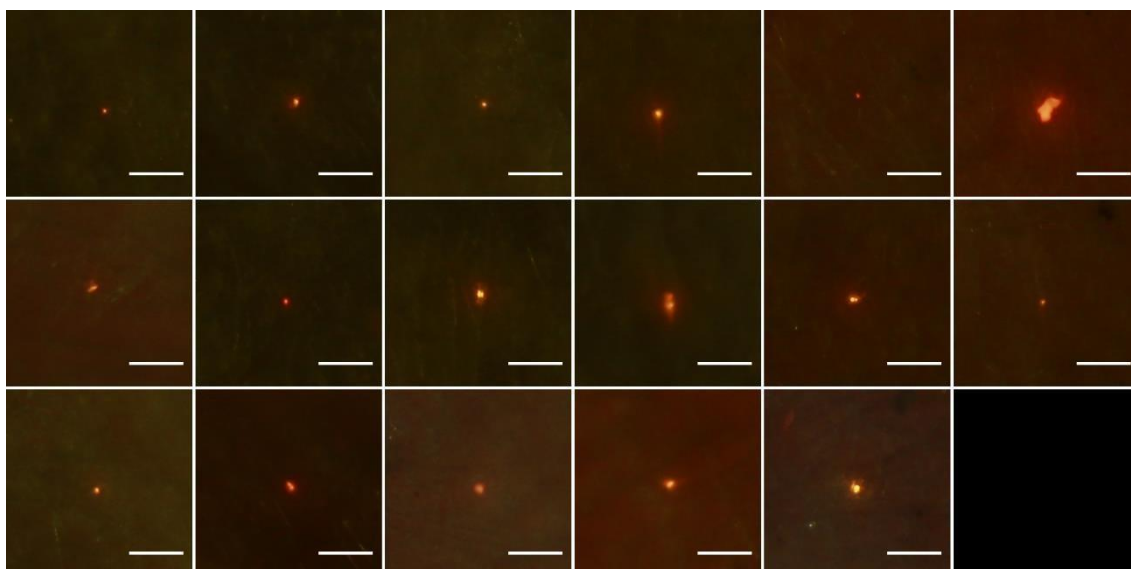

**Figure S18.** Fluorescent particles (suspected microplastics), with a 50  $\mu\text{m}$  scale, observed in 23% of the filter (without blank subtraction) of A019.

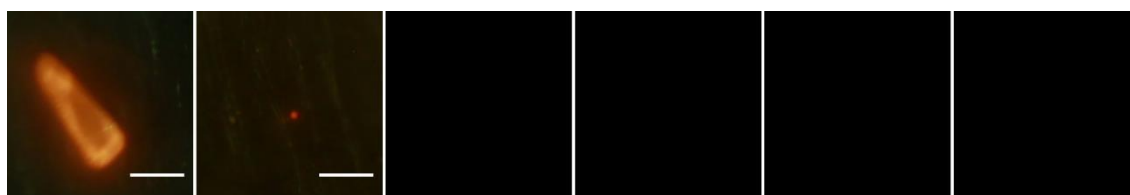

**Figure S19.** Fluorescent particles (suspected microplastics), with a 50  $\mu\text{m}$  scale, observed in 23% of the filter (without blank subtraction) of A020.

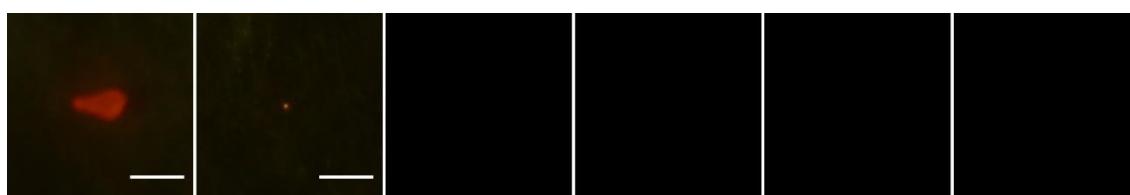

**Figure S20.** Fluorescent particles (suspected microplastics), with a 50  $\mu\text{m}$  scale, observed in 23% of the filter (without blank subtraction) of A021.

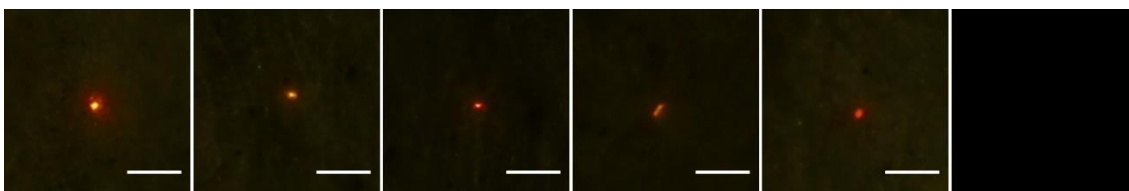

**Figure S21.** Fluorescent particles (suspected microplastics), with a 50  $\mu\text{m}$  scale, observed in 23% of the filter (without blank subtraction) of A022.

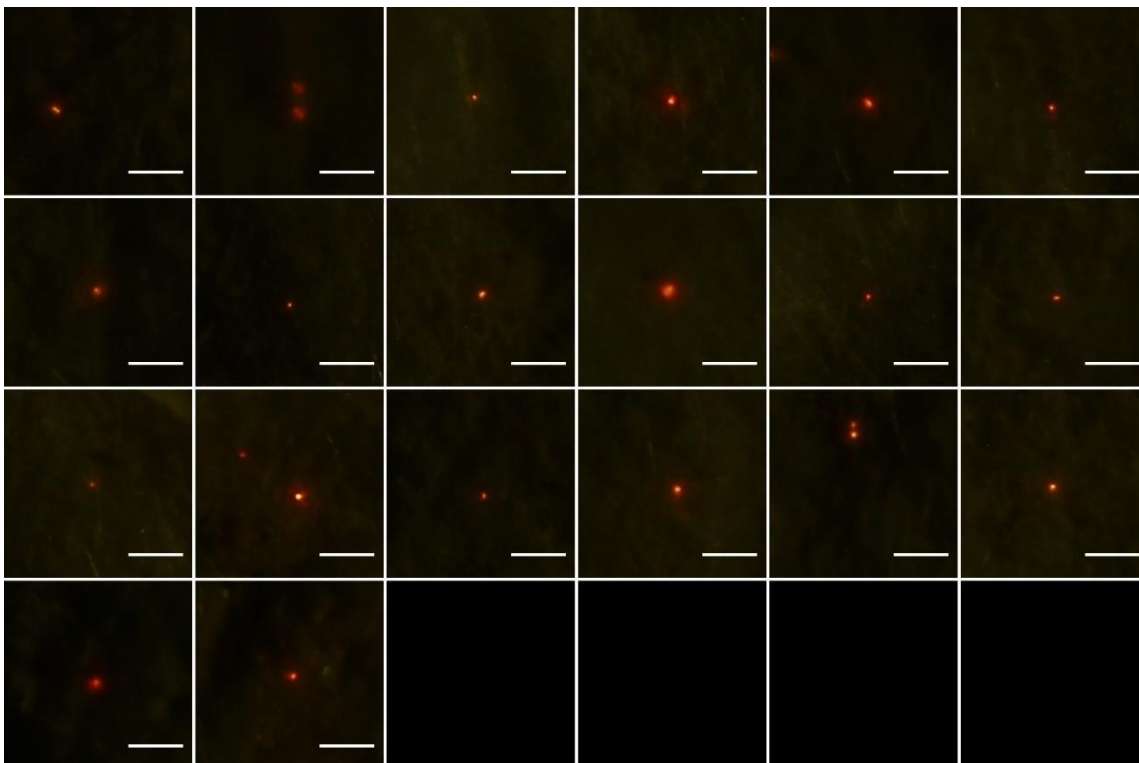

**Figure S22.** Fluorescent particles (suspected microplastics), with a 50  $\mu\text{m}$  scale, observed in 23% of the filter (without blank subtraction) of A023.

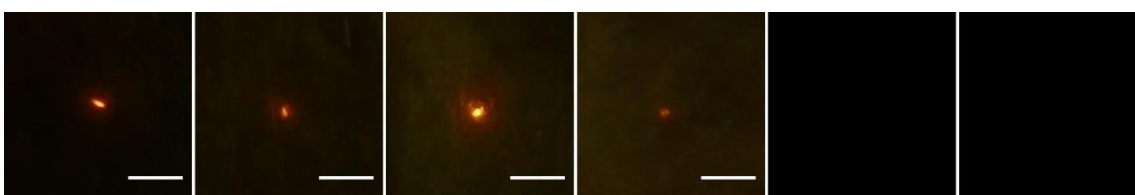

**Figure S23.** Fluorescent particles (suspected microplastics), with a 50  $\mu\text{m}$  scale, observed in 23% of the filter (without blank subtraction) of A024.

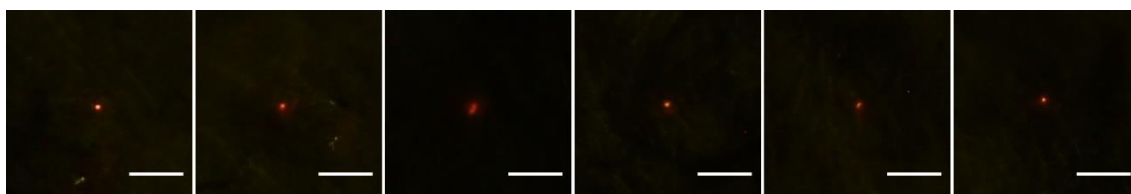

**Figure S24.** Fluorescent particles (suspected microplastics), with a 50  $\mu\text{m}$  scale, observed in 23% of the filter (without blank subtraction) of A026.

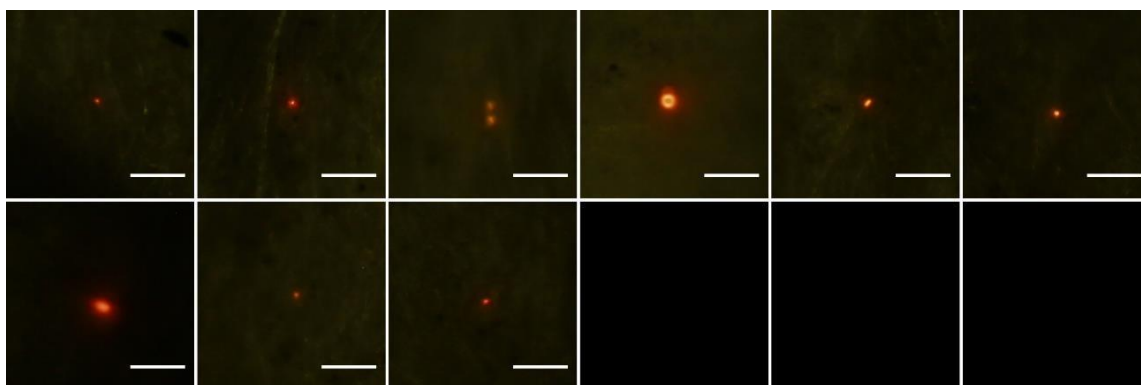

**Figure S25.** Fluorescent particles (suspected microplastics), with a 50  $\mu\text{m}$  scale, observed in 23% of the filter (without blank subtraction) of A027.

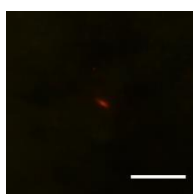

**Figure S26.** Fluorescent particles (suspected microplastics), with a 50  $\mu\text{m}$  scale, observed in 23% of the filter (without blank subtraction) of A028.

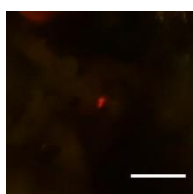

**Figure S27.** Fluorescent particles (suspected microplastics), with a 50  $\mu\text{m}$  scale, observed in 23% of the filter (without blank subtraction) of A029.

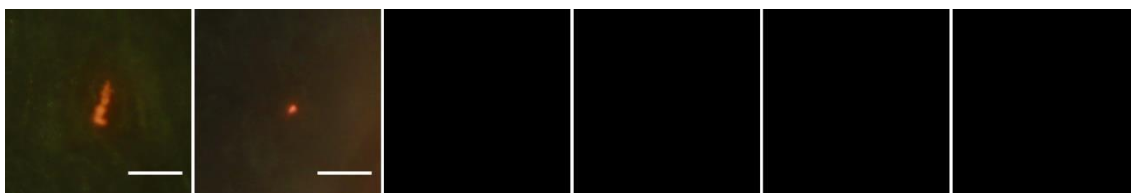

**Figure S28.** Fluorescent particles (suspected microplastics), with a 50  $\mu\text{m}$  scale, observed in 23% of the filter (without blank subtraction) of A032.

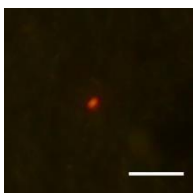

**Figure S29.** Fluorescent particles (suspected microplastics), with a 50  $\mu\text{m}$  scale, observed in 23% of the filter (without blank subtraction) of A033.

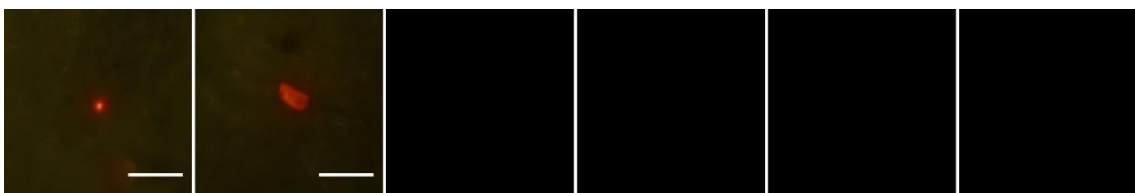

**Figure S30.** Fluorescent particles (suspected microplastics), with a 50  $\mu\text{m}$  scale, observed in 23% of the filter (without blank subtraction) of A037.

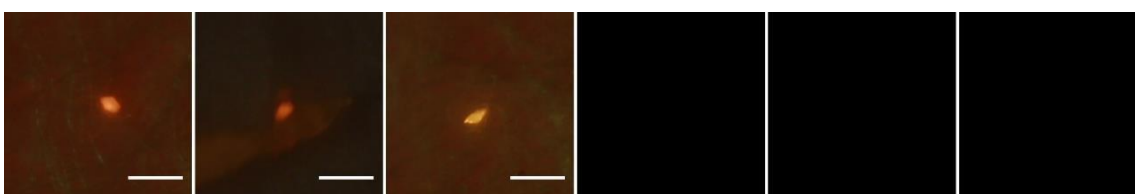

**Figure S31.** Fluorescent particles (suspected microplastics), with a 50  $\mu\text{m}$  scale, observed in 23% of the filter (without blank subtraction) of A038.

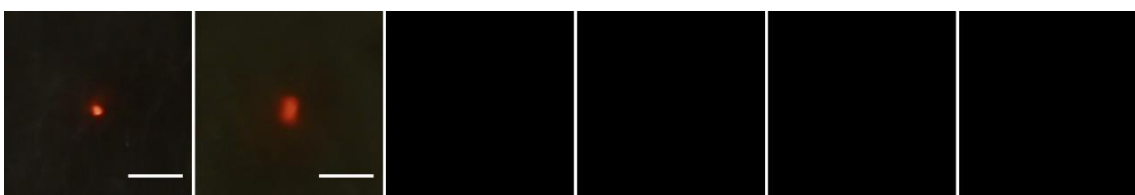

**Figure S32.** Fluorescent particles (suspected microplastics), with a 50  $\mu\text{m}$  scale, observed in 23% of the filter (without blank subtraction) of A040.

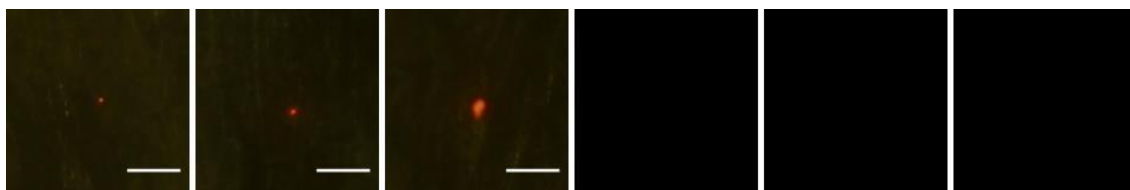

**Figure S33.** Fluorescent particles (suspected microplastics), with a 50  $\mu\text{m}$  scale, observed in 23% of the filter (without blank subtraction) of A041.

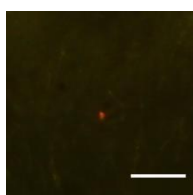

**Figure S34.** Fluorescent particles (suspected microplastics), with a 50  $\mu\text{m}$  scale, observed in 23% of the filter (without blank subtraction) of A042.

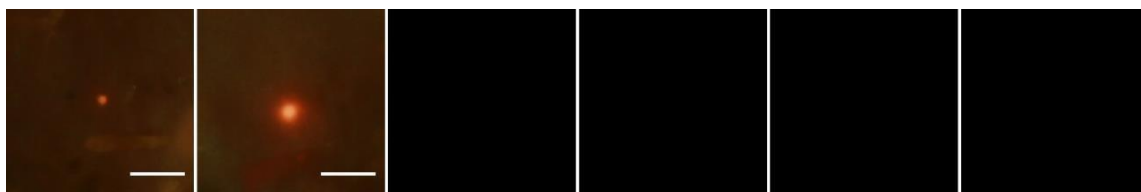

**Figure S35.** Fluorescent particles (suspected microplastics), with a 50  $\mu\text{m}$  scale, observed in 23% of the filter (without blank subtraction) of A044.

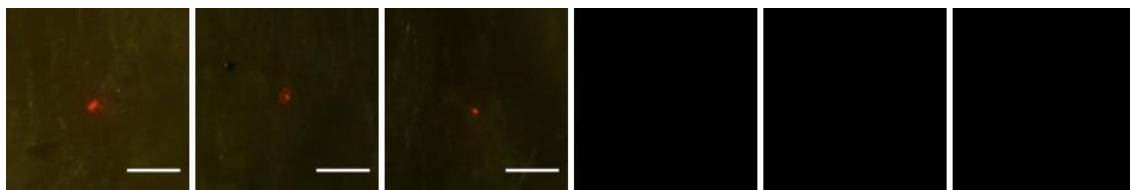

**Figure S36.** Fluorescent particles (suspected microplastics), with a 50  $\mu\text{m}$  scale, observed in 23% of the filter (without blank subtraction) of A046.

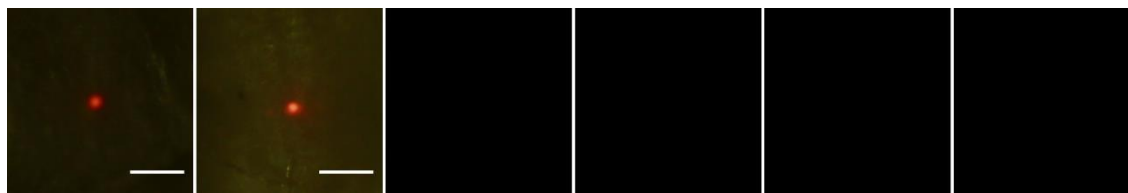

**Figure S37.** Fluorescent particles (suspected microplastics), with a 50  $\mu\text{m}$  scale, observed in 23% of the filter (without blank subtraction) of A047.

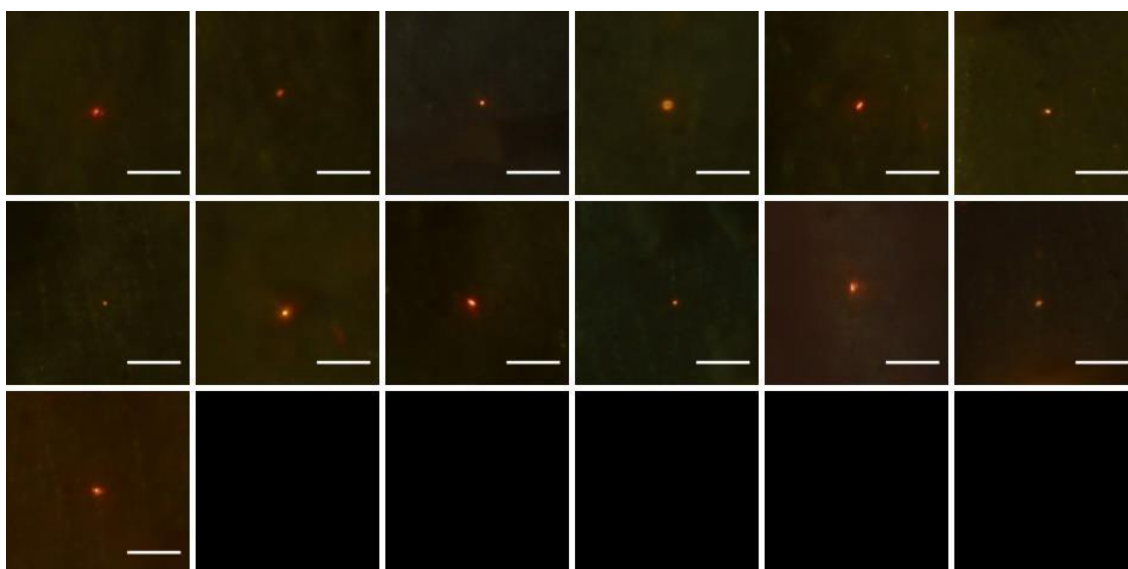

**Figure S38.** Fluorescent particles (suspected microplastics), with a 50  $\mu\text{m}$  scale, observed in 23% of the filter (without blank subtraction) of A048.

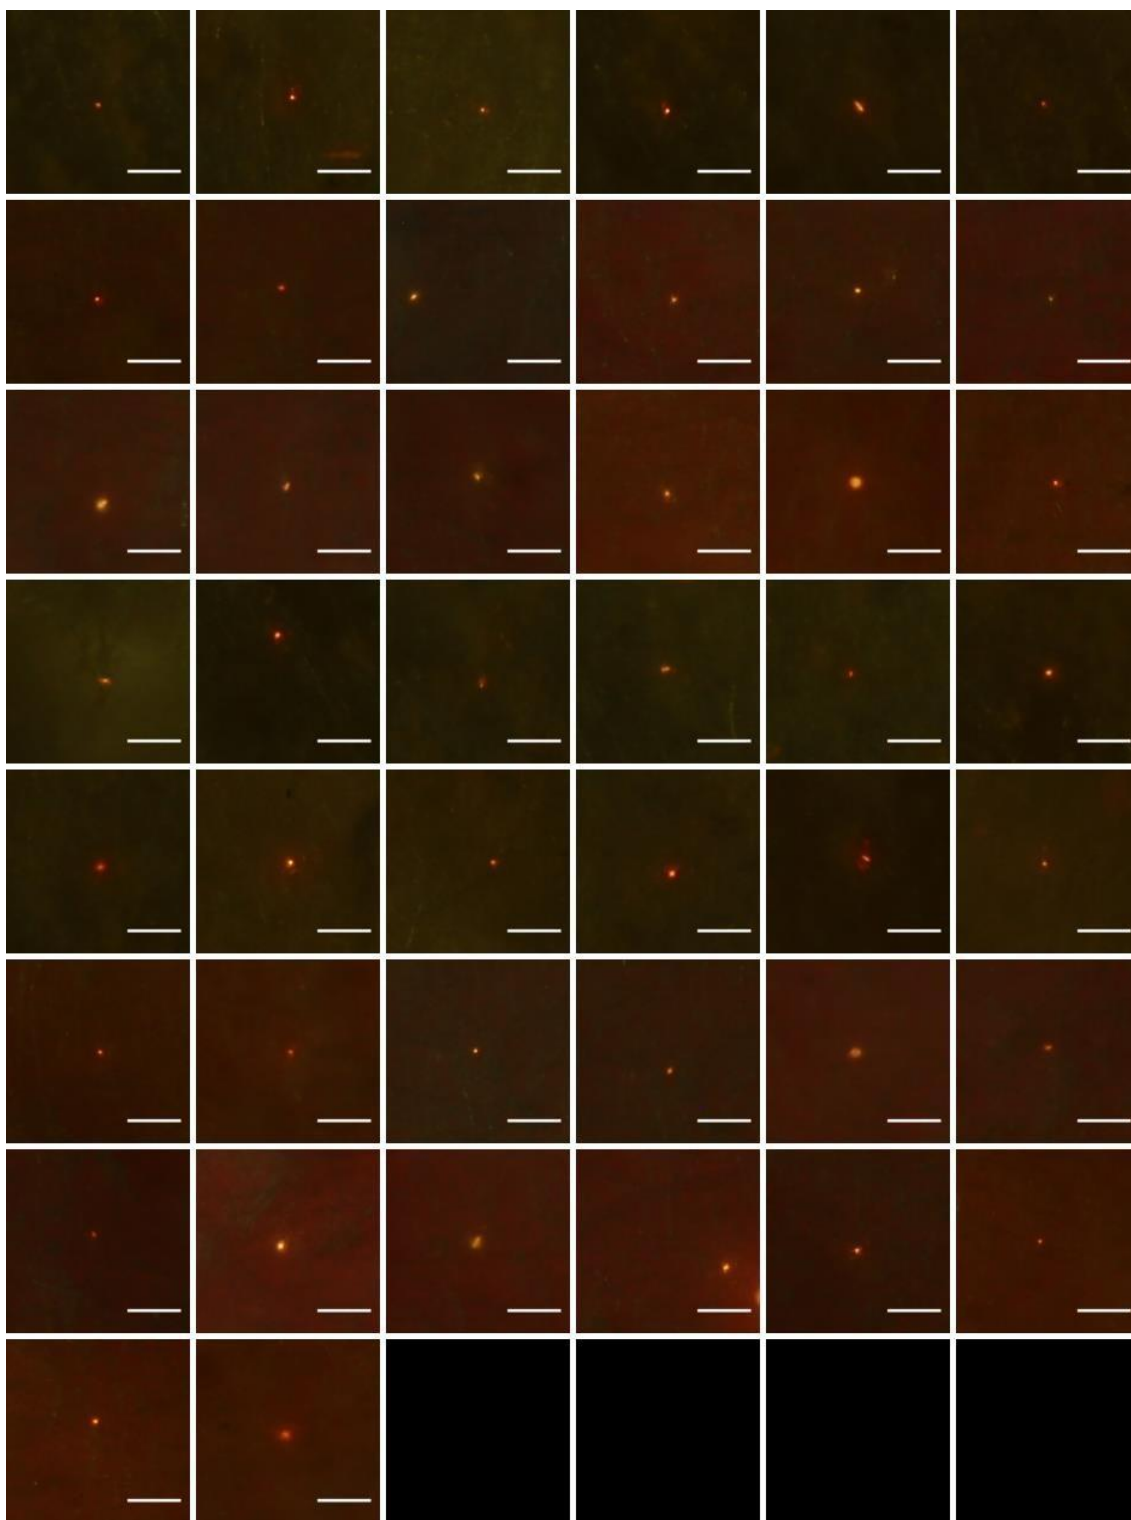

**Figure S39.** Fluorescent particles (suspected microplastics), with a 50  $\mu\text{m}$  scale, observed in 23% of the filter (without blank subtraction) of A049.

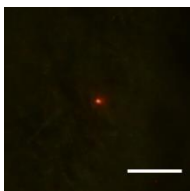

**Figure S40.** Fluorescent particles (suspected microplastics), with a 50 µm scale, observed in 23% of the filter (without blank subtraction) of A051.

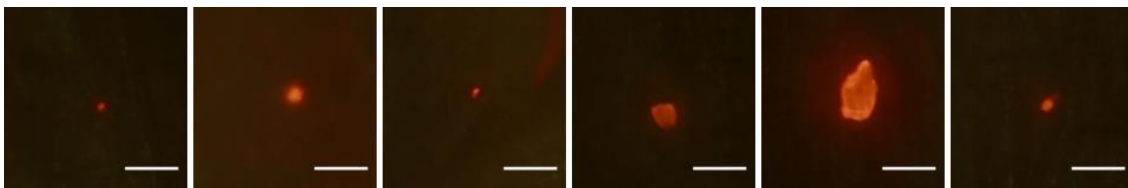

**Figure S41.** Fluorescent particles (suspected microplastics), with a 50 µm scale, observed in 23% of the filter (without blank subtraction) of A052.

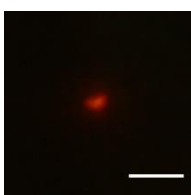

**Figure S42.** Fluorescent particles (suspected microplastics), with a 50 µm scale, observed in 23% of the filter (without blank subtraction) of A055.

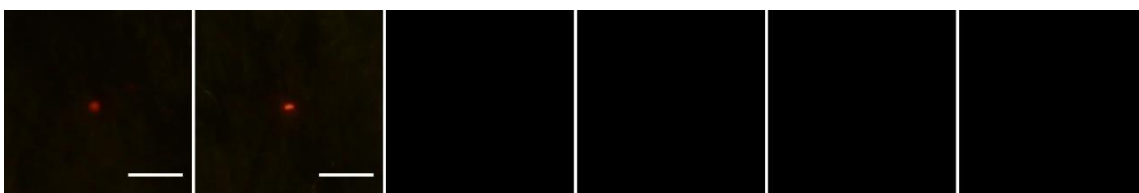

**Figure S43.** Fluorescent particles (suspected microplastics), with a 50 µm scale, observed in 23% of the filter (without blank subtraction) of A056.

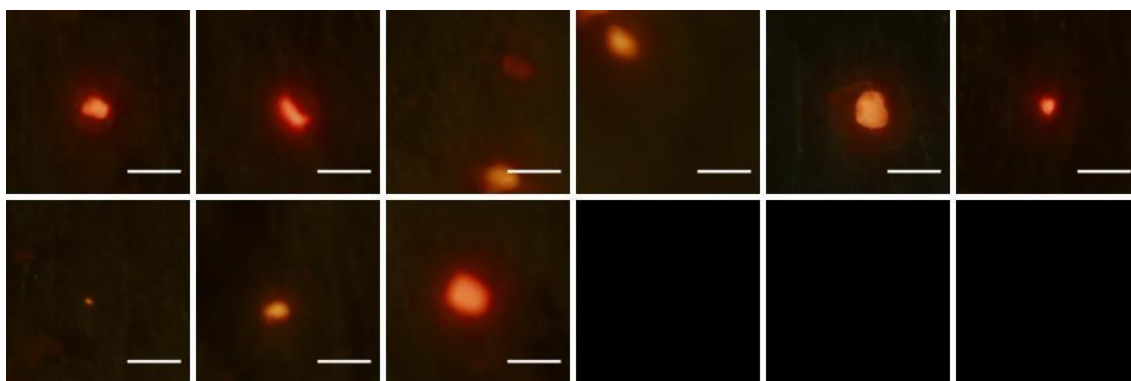

**Figure S44.** Fluorescent particles (suspected microplastics), with a 50  $\mu\text{m}$  scale, observed in 23% of the filter (without blank subtraction) of A058.

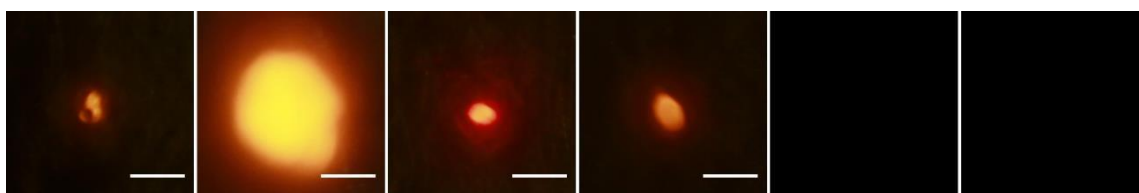

**Figure S45.** Fluorescent particles (suspected microplastics), with a 50  $\mu\text{m}$  scale, observed in 23% of the filter (without blank subtraction) of A059.

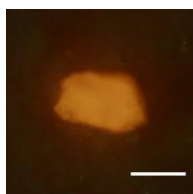

**Figure S46.** Fluorescent particles (suspected microplastics), with a 50  $\mu\text{m}$  scale, observed in 23% of the filter (without blank subtraction) of A069.

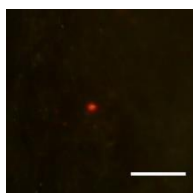

**Figure S47.** Fluorescent particles (suspected microplastics), with a 50  $\mu\text{m}$  scale, observed in 23% of the filter (without blank subtraction) of A071.

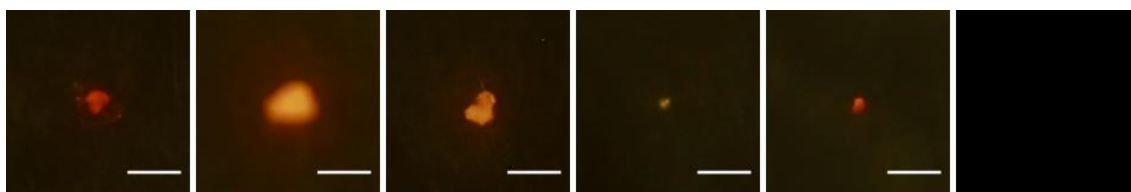

**Figure S48.** Fluorescent particles (suspected microplastics), with a 50  $\mu\text{m}$  scale, observed in 23% of the filter (without blank subtraction) of A072.

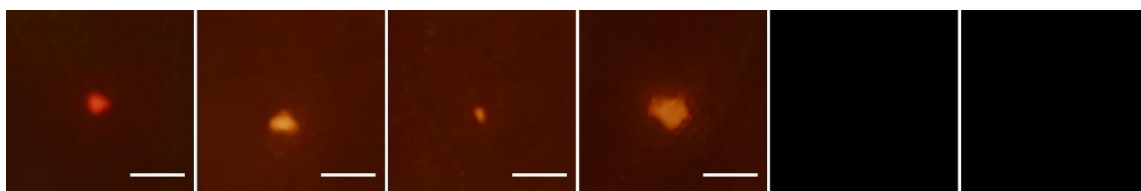

**Figure S49.** Fluorescent particles (suspected microplastics), with a 50  $\mu\text{m}$  scale, observed in 23% of the filter (without blank subtraction) of A073.

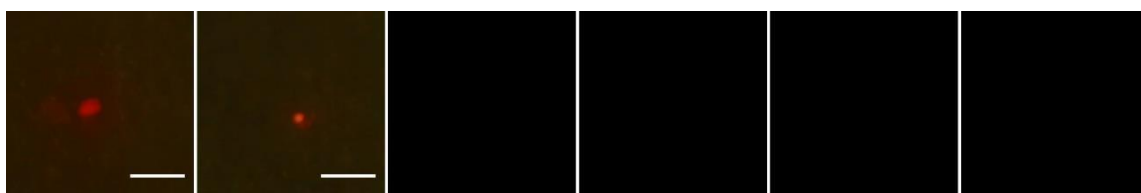

**Figure S50.** Fluorescent particles (suspected microplastics), with a 50  $\mu\text{m}$  scale, observed in 23% of the filter (without blank subtraction) of A074.

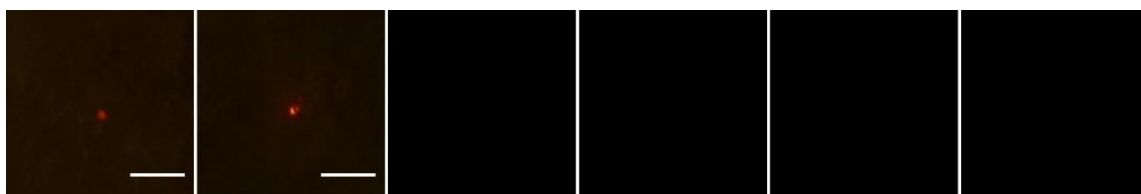

**Figure S51.** Fluorescent particles (suspected microplastics), with a 50  $\mu\text{m}$  scale, observed in 23% of the filter (without blank subtraction) of A077.

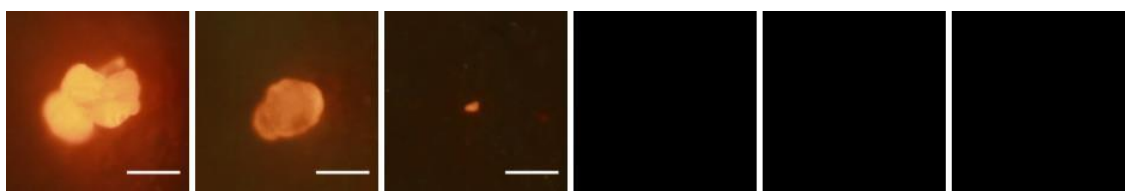

**Figure S52.** Fluorescent particles (suspected microplastics), with a 50  $\mu\text{m}$  scale, observed in 23% of the filter (without blank subtraction) of A079.

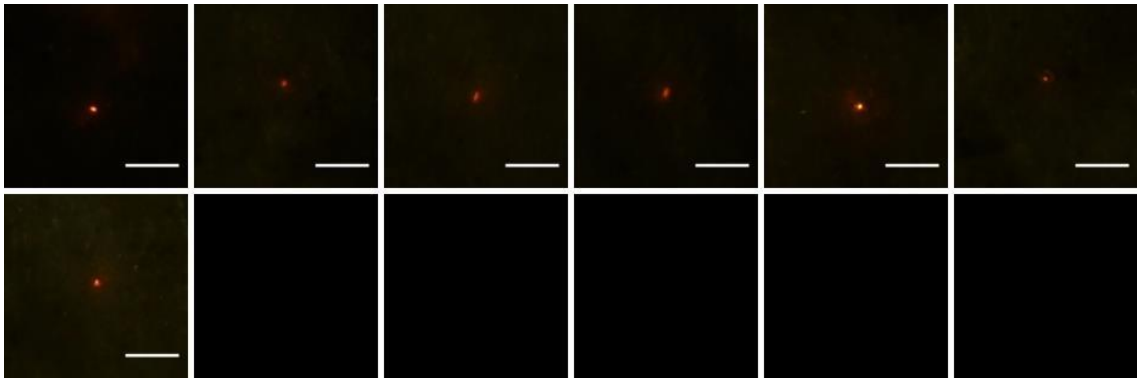

**Figure S53.** Fluorescent particles (suspected microplastics), with a 50  $\mu\text{m}$  scale, observed in 23% of the filter (without blank subtraction) of A082.

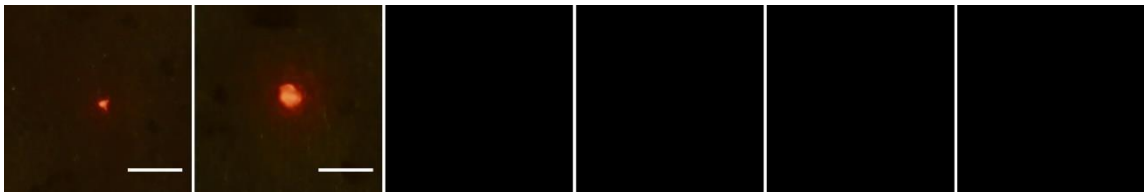

**Figure S54.** Fluorescent particles (suspected microplastics), with a 50  $\mu\text{m}$  scale, observed in 23% of the filter (without blank subtraction) of A084.

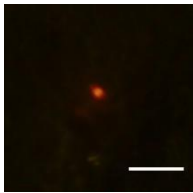

**Figure S55.** Fluorescent particles (suspected microplastics), with a 50  $\mu\text{m}$  scale, observed in 23% of the filter (without blank subtraction) of A086.

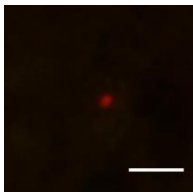

**Figure S56.** Fluorescent particles (suspected microplastics), with a 50  $\mu\text{m}$  scale, observed in 23% of the filter (without blank subtraction) of A087.

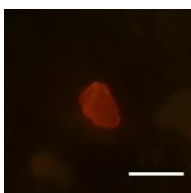

**Figure S57.** Fluorescent particles (suspected microplastics), with a 50  $\mu\text{m}$  scale, observed in 23% of the filter (without blank subtraction) of A088.

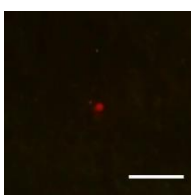

**Figure S58.** Fluorescent particles (suspected microplastics), with a 50  $\mu\text{m}$  scale, observed in 23% of the filter (without blank subtraction) of A089.

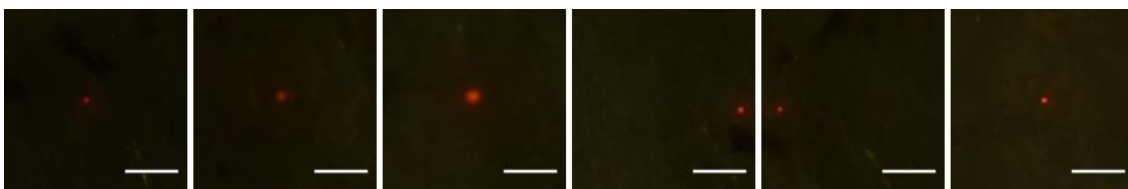

**Figure S59.** Fluorescent particles (suspected microplastics), with a 50  $\mu\text{m}$  scale, observed in 23% of the filter (without blank subtraction) of A092.

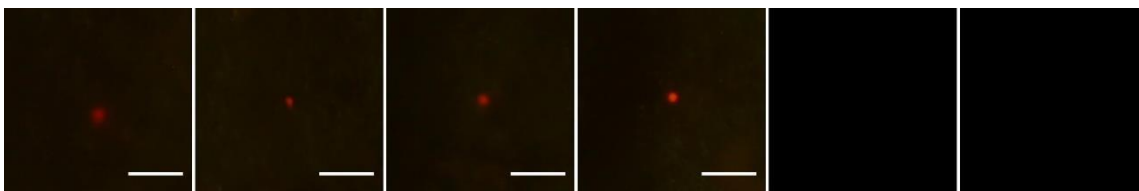

**Figure S60.** Fluorescent particles (suspected microplastics), with a 50  $\mu\text{m}$  scale, observed in 23% of the filter (without blank subtraction) of A093.

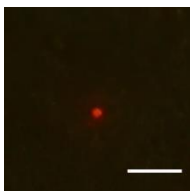

**Figure S61.** Fluorescent particles (suspected microplastics), with a 50  $\mu\text{m}$  scale, observed in 23 of the filter (without blank subtraction) of A094.

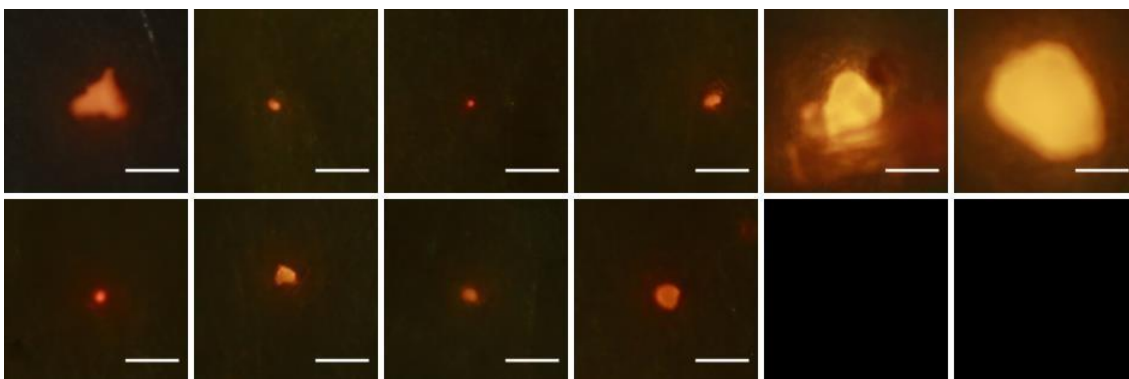

**Figure S62.** Fluorescent particles (suspected microplastics), with a 50  $\mu\text{m}$  scale, observed in 23% of the filter (without blank subtraction) of A095.

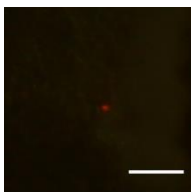

**Figure S63.** Fluorescent particles (suspected microplastics), with a 50  $\mu\text{m}$  scale, observed in 23% of the filter (without blank subtraction) of A108.

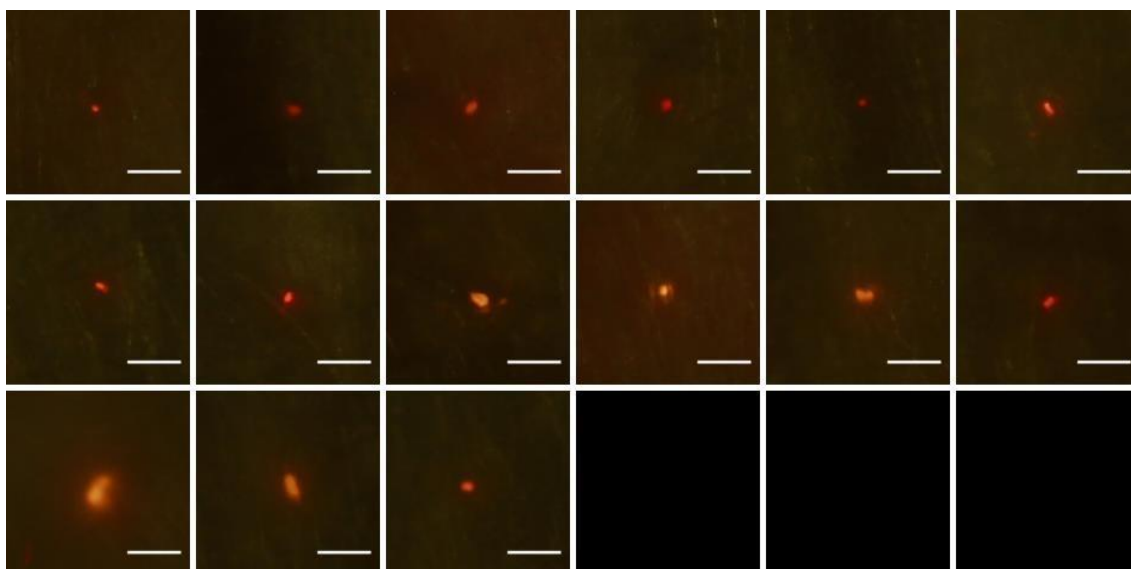

**Figure S64.** Fluorescent particles (suspected microplastics), with a 50  $\mu\text{m}$  scale, observed in 23% of the filter of blank 1 (batch 1).

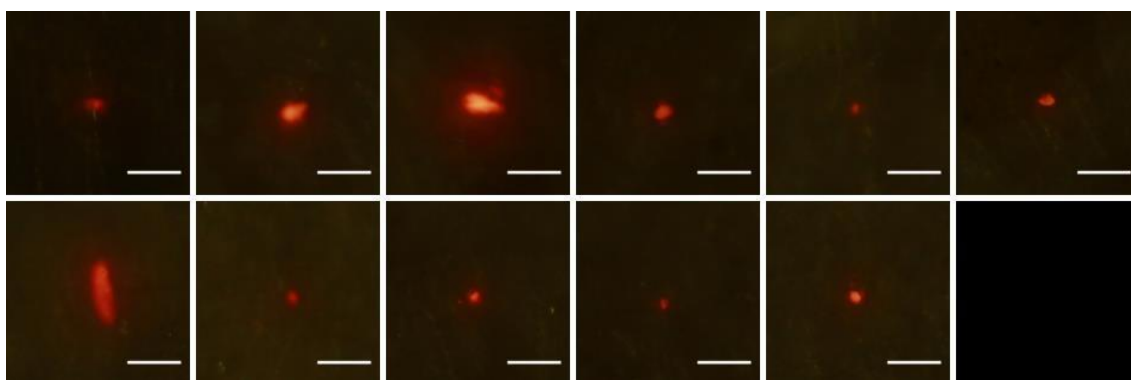

**Figure S65.** Fluorescent particles (suspected microplastics), with a 50  $\mu\text{m}$  scale, observed in 23% of the filter (without blank subtraction) of blank 2 (batch 1).

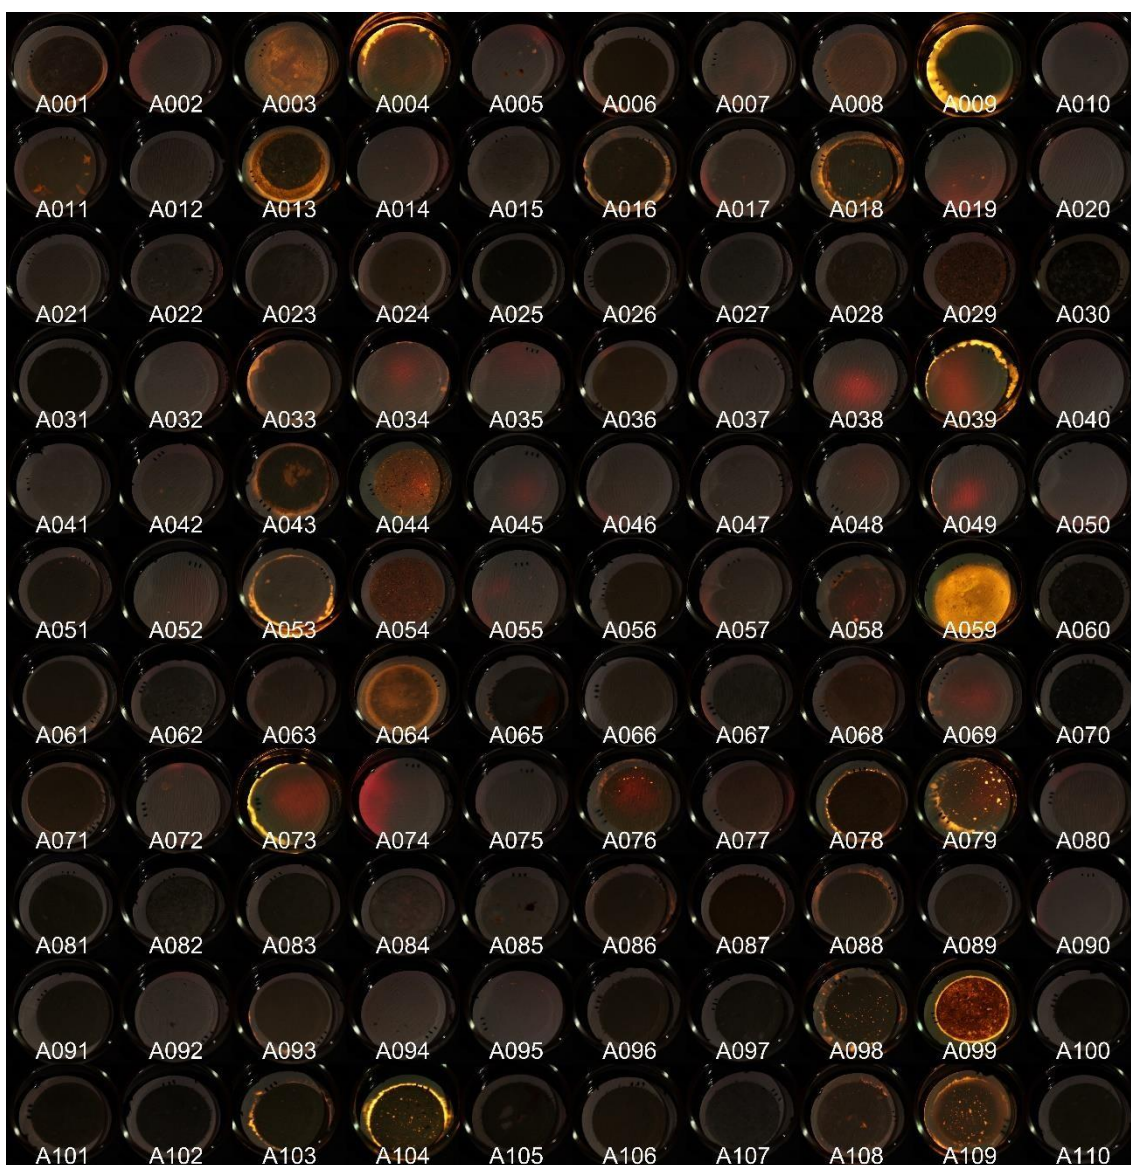

**Figure S66.** Filter membranes of the batch 1 of companion animal samples.

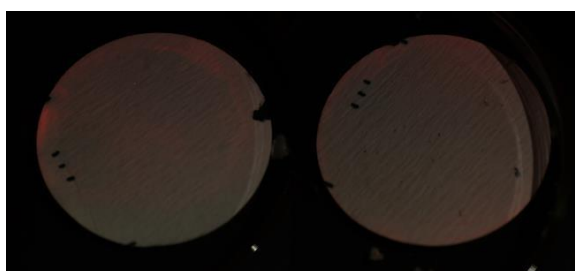

**Figure S67.** Filter membranes of batch 1 blanks.

## **Batch 2**

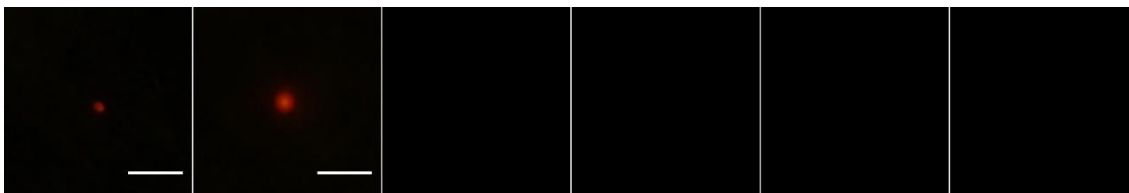

**Figure S68.** Fluorescent particles (suspected microplastics), with a 50  $\mu\text{m}$  scale, observed in 23% of the filter (without blank subtraction) of A111.

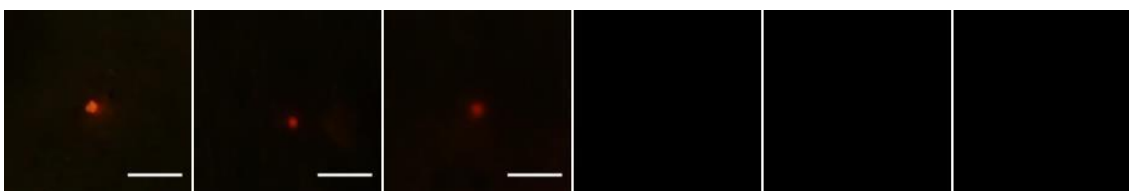

**Figure S69.** Fluorescent particles (suspected microplastics), with a 50  $\mu\text{m}$  scale, observed in 23% of the filter (without blank subtraction) of A112.

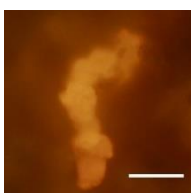

**Figure S70.** Fluorescent particles (suspected microplastics), with a 50  $\mu\text{m}$  scale, observed in 23% of the filter (without blank subtraction) of A113.

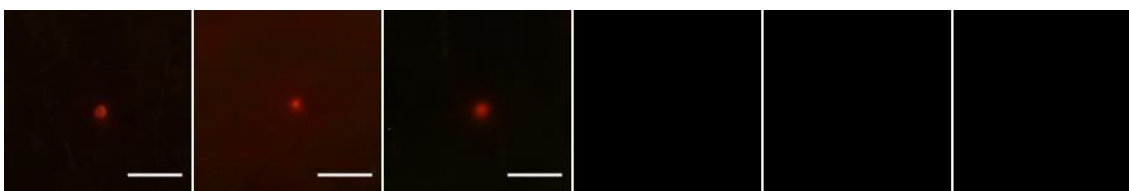

**Figure S71.** Fluorescent particles (suspected microplastics), with a 50  $\mu\text{m}$  scale, observed in 23% of the filter (without blank subtraction) of A115.

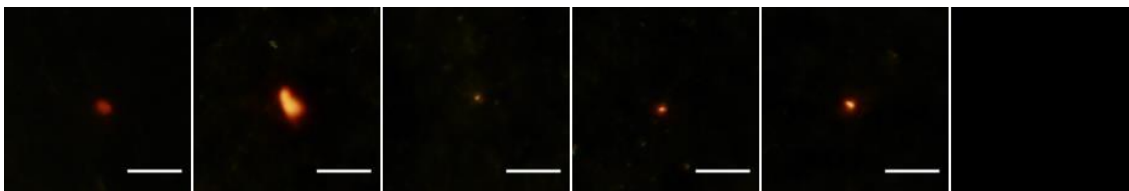

**Figure S72.** Fluorescent particles (suspected microplastics), with a 50  $\mu\text{m}$  scale, observed in 23% of the filter (without blank subtraction) of A122.

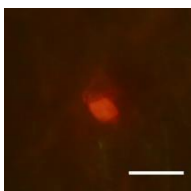

**Figure S73.** Fluorescent particles (suspected microplastics), with a 50  $\mu\text{m}$  scale, observed in 23% of the filter (without blank subtraction) of A124.

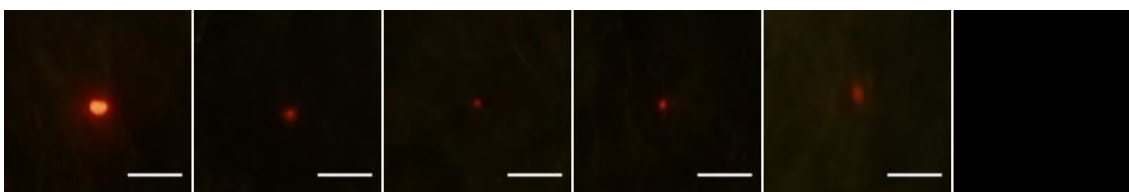

**Figure S74.** Fluorescent particles (suspected microplastics), with a 50  $\mu\text{m}$  scale, observed in 23% of the filter (without blank subtraction) of A125.

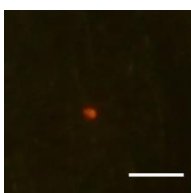

**Figure S75.** Fluorescent particles (suspected microplastics), with a 50  $\mu\text{m}$  scale, observed in 23% of the filter (without blank subtraction) of A126.

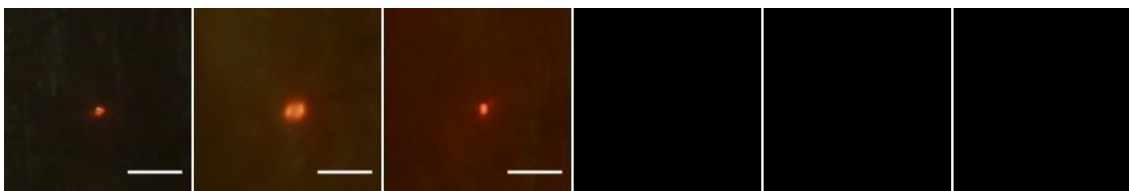

**Figure S76.** Fluorescent particles (suspected microplastics), with a 50  $\mu\text{m}$  scale, observed in 23% of the filter (without blank subtraction) of A127.

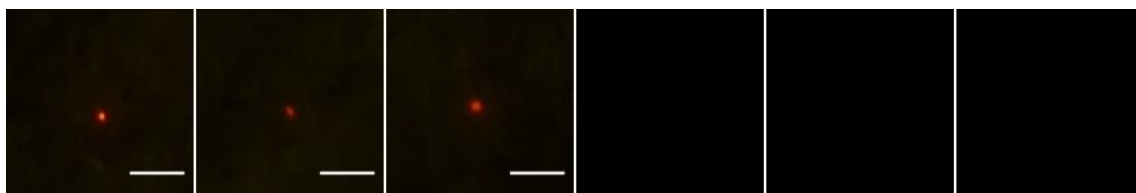

**Figure S77.** Fluorescent particles (suspected microplastics), with a 50  $\mu\text{m}$  scale, observed in 23% of the filter (without blank subtraction) of A134.

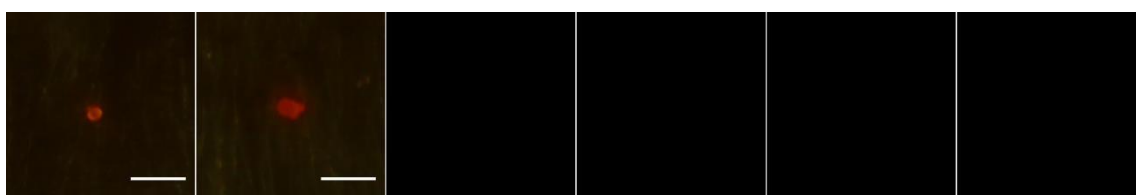

**Figure S78.** Fluorescent particles (suspected microplastics), with a 50  $\mu\text{m}$  scale, observed in 23% of the filter (without blank subtraction) of A135.

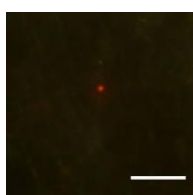

**Figure S79.** Fluorescent particles (suspected microplastics), with a 50  $\mu\text{m}$  scale, observed in 23% of the filter (without blank subtraction) of A136.

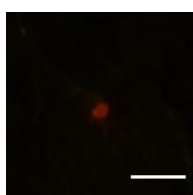

**Figure S80.** Fluorescent particles (suspected microplastics), with a 50  $\mu\text{m}$  scale, observed in 23% of the filter (without blank subtraction) of A138.

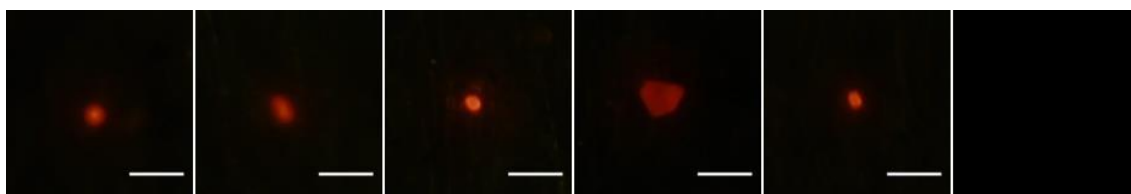

**Figure S81.** Fluorescent particles (suspected microplastics), with a 50  $\mu\text{m}$  scale, observed in 23% of the filter (without blank subtraction) of A139.

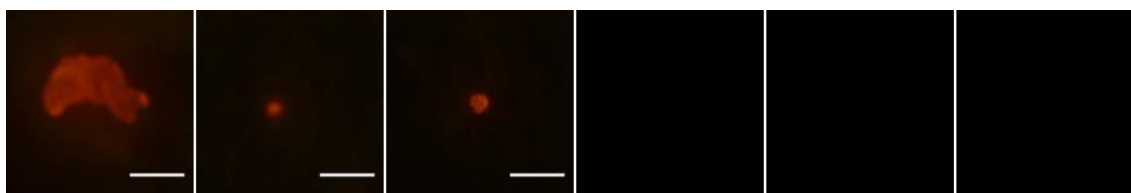

**Figure S82.** Fluorescent particles (suspected microplastics), with a 50  $\mu\text{m}$  scale, observed in 23% of the filter (without blank subtraction) of A140.

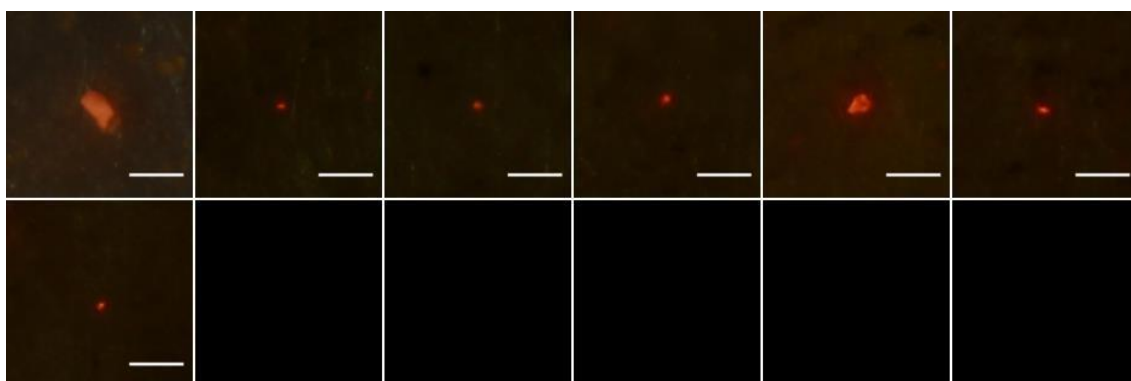

**Figure S83.** Fluorescent particles (suspected microplastics), with a 50  $\mu\text{m}$  scale, observed in 23% of the filter (without blank subtraction) of A141.

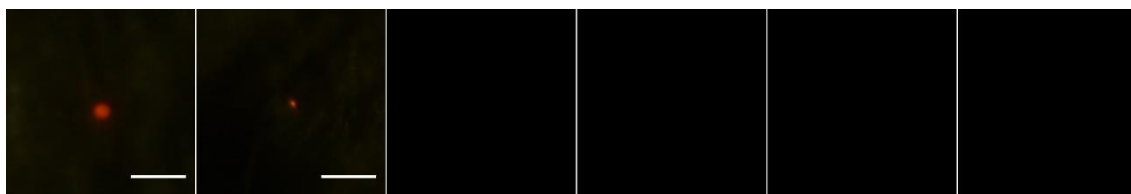

**Figure S84.** Fluorescent particles (suspected microplastics), with a 50  $\mu\text{m}$  scale, observed in 23% of the filter (without blank subtraction) of A142.

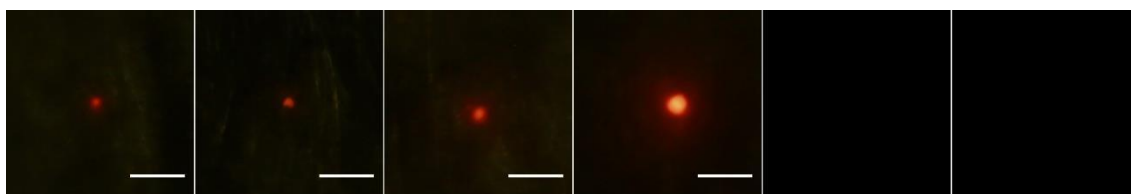

**Figure S85.** Fluorescent particles (suspected microplastics), with a 50  $\mu\text{m}$  scale, observed in 23% of the filter (without blank subtraction) of A144.

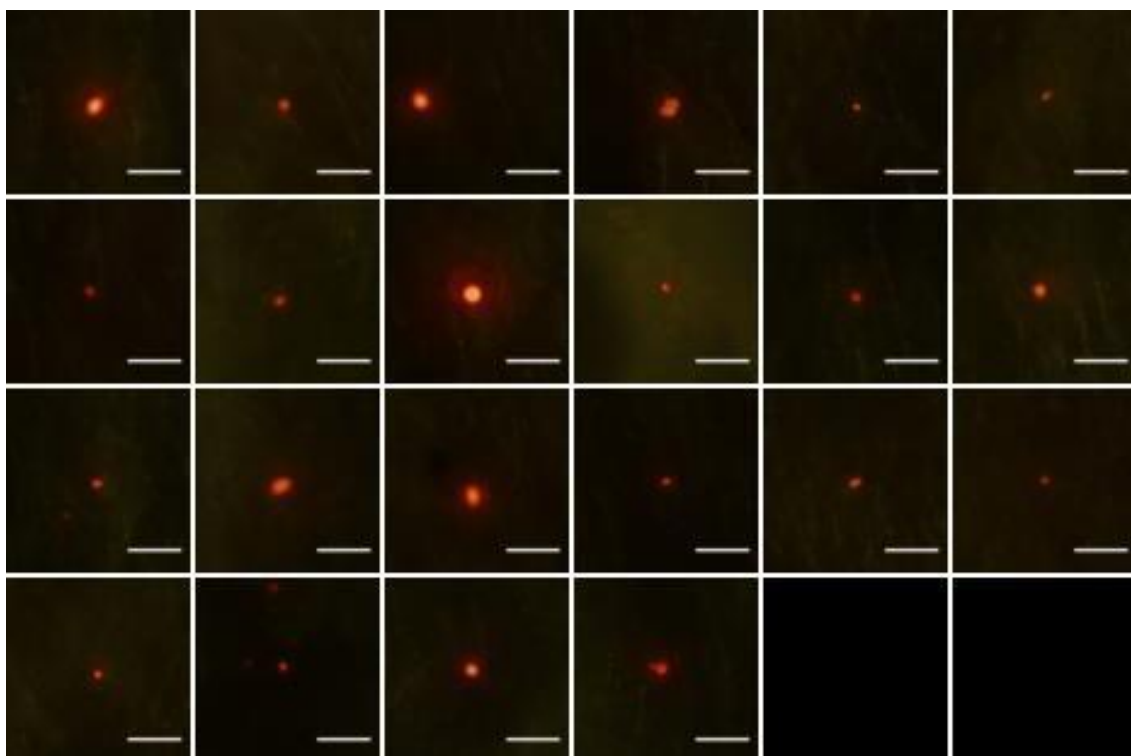

**Figure S86.** Fluorescent particles (suspected microplastics), with a 50  $\mu\text{m}$  scale, observed in 23% of the filter (without blank subtraction) of A145.

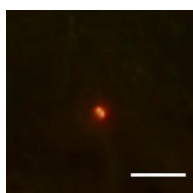

**Figure S87.** Fluorescent particles (suspected microplastics), with a 50  $\mu\text{m}$  scale, observed in 23% of the filter (without blank subtraction) of A146.

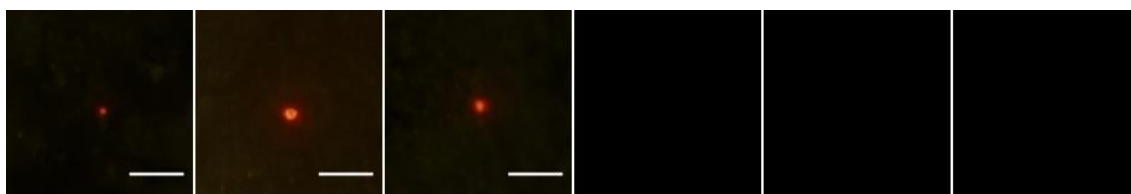

**Figure S88.** Fluorescent particles (suspected microplastics), with a 50  $\mu\text{m}$  scale, observed in 23% of the filter (without blank subtraction) of A148.

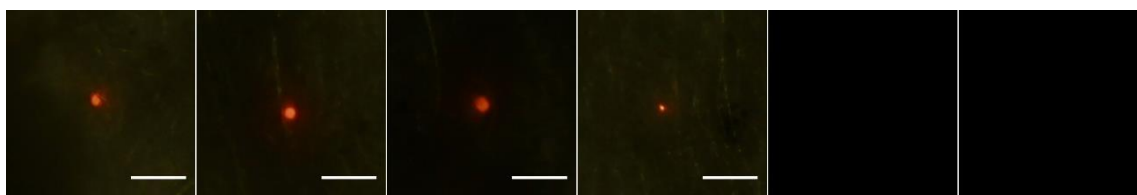

**Figure S89.** Fluorescent particles (suspected microplastics), with a 50  $\mu\text{m}$  scale, observed in 23% of the filter (without blank subtraction) of A149.

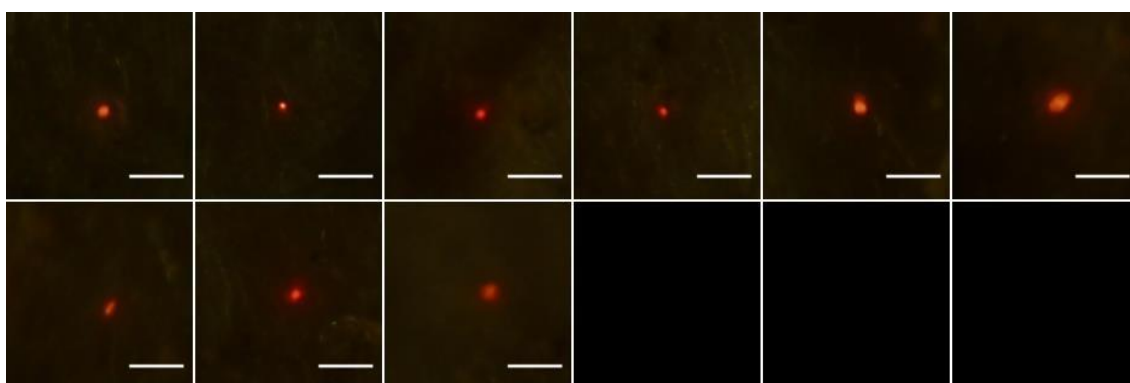

**Figure S90.** Fluorescent particles (suspected microplastics), with a 50  $\mu\text{m}$  scale, observed in 23% of the filter (without blank subtraction) of A150.

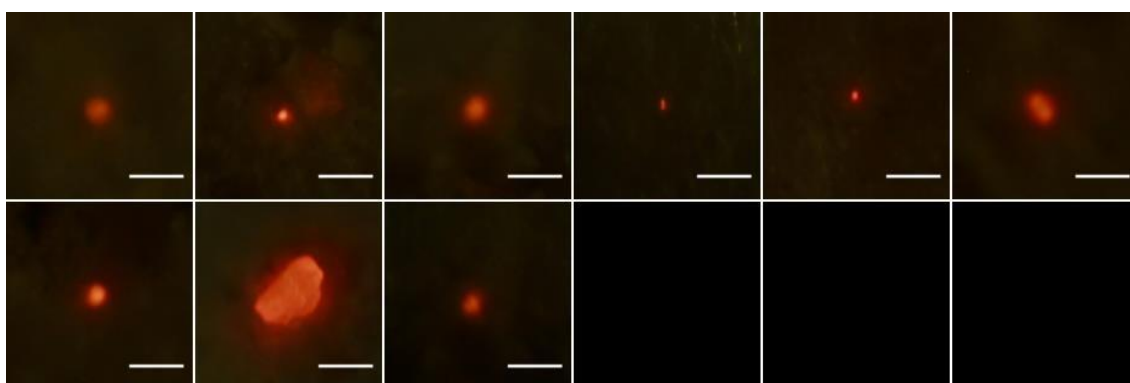

**Figure S91.** Fluorescent particles (suspected microplastics), with a 50  $\mu\text{m}$  scale, observed in 23% of the filter (without blank subtraction) of A151.

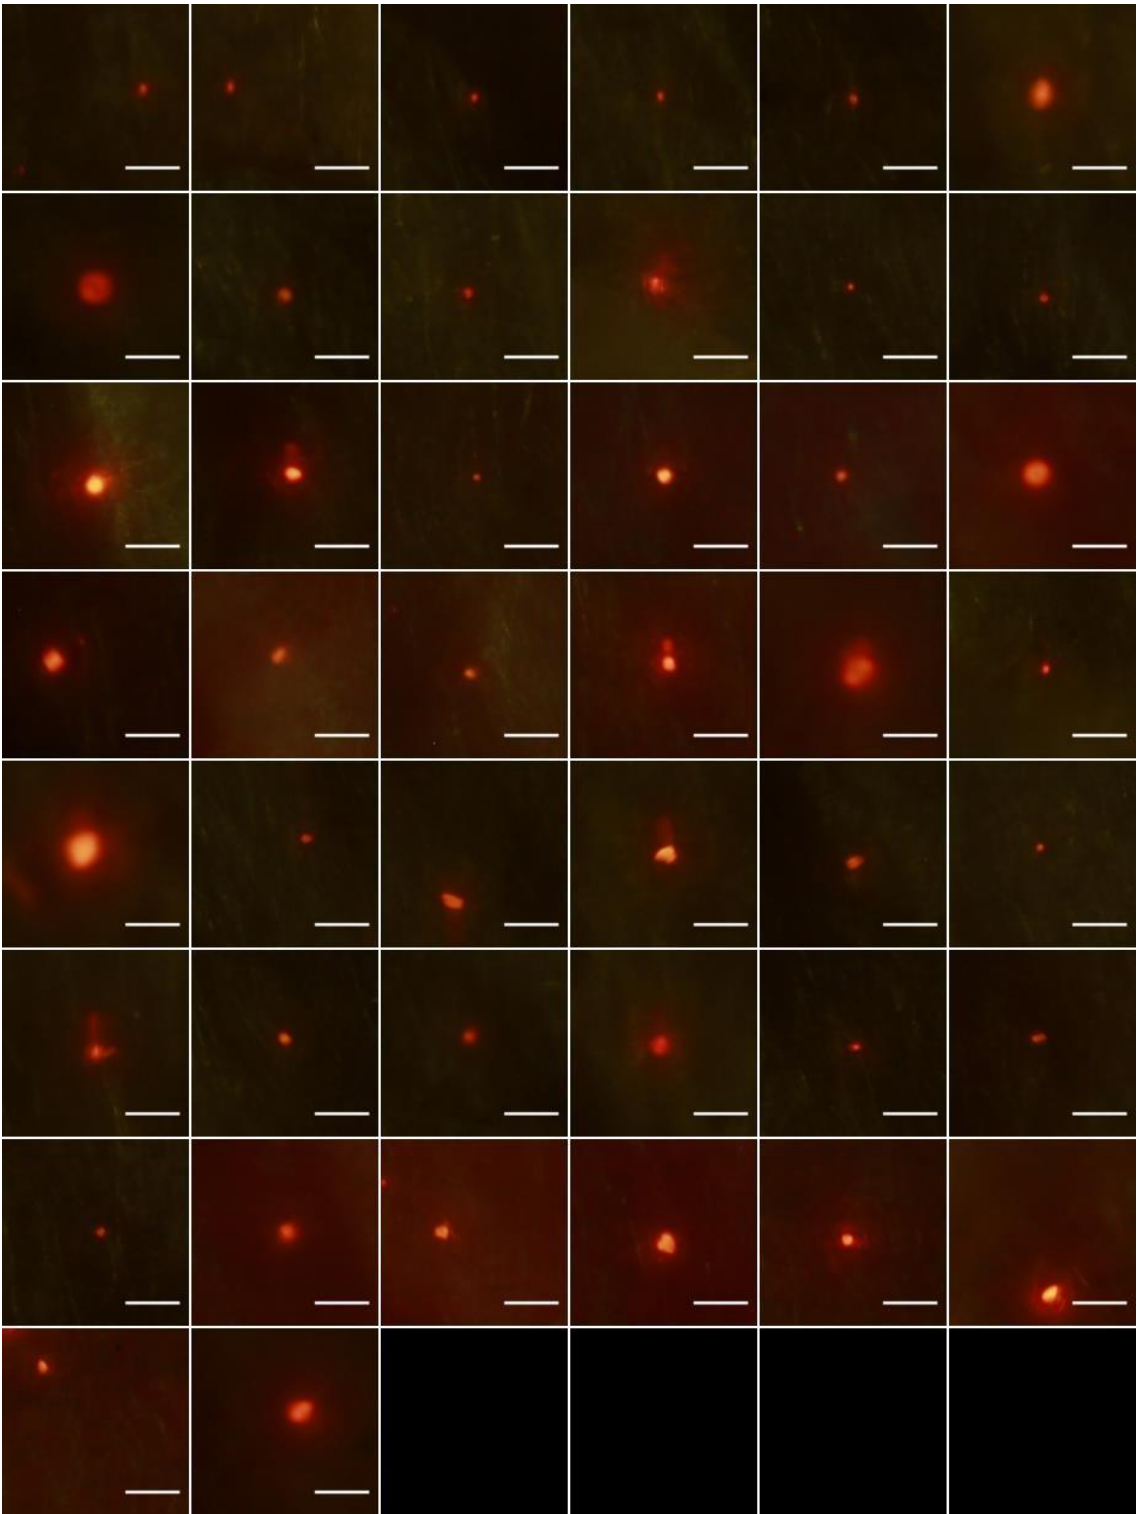

**Figure S92.** Fluorescent particles (suspected microplastics), with a 50  $\mu\text{m}$  scale, observed in 23% of the filter (without blank subtraction) of A152.

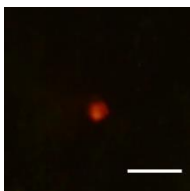

**Figure S93.** Fluorescent particles (suspected microplastics), with a 50  $\mu\text{m}$  scale, observed in 23% of the filter (without blank subtraction) of A153.

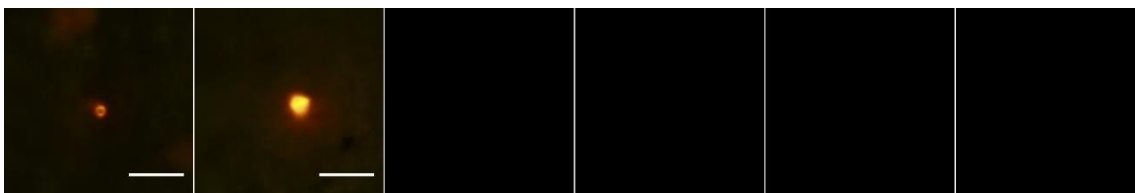

**Figure S94.** Fluorescent particles (suspected microplastics), with a 50  $\mu\text{m}$  scale, observed in 23% of the filter (without blank subtraction) of A154.

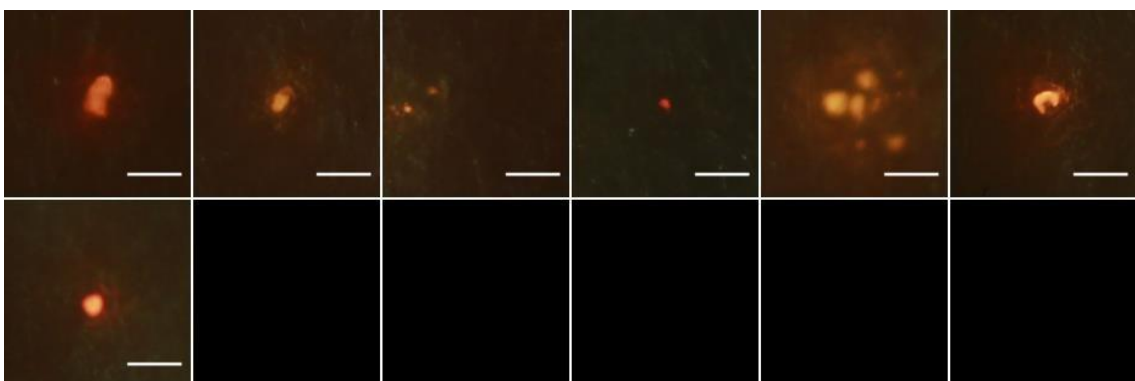

**Figure S95.** Fluorescent particles (suspected microplastics), with a 50  $\mu\text{m}$  scale, observed in 23% of the filter (without blank subtraction) of A155.

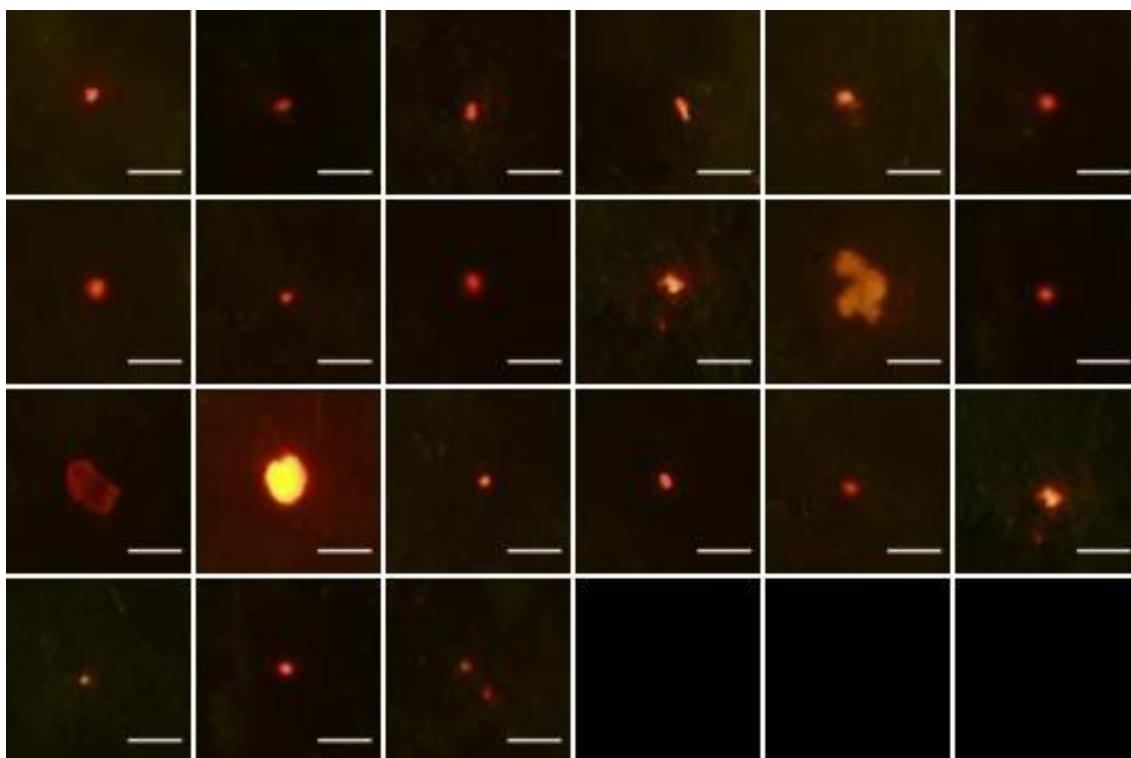

**Figure S96.** Fluorescent particles (suspected microplastics), with a 50  $\mu\text{m}$  scale, observed in 23% of the filter (without blank subtraction) of A159.

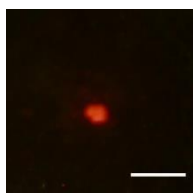

**Figure S97.** Fluorescent particles (suspected microplastics), with a 50  $\mu\text{m}$  scale, observed in 23% of the filter (without blank subtraction) of A160.

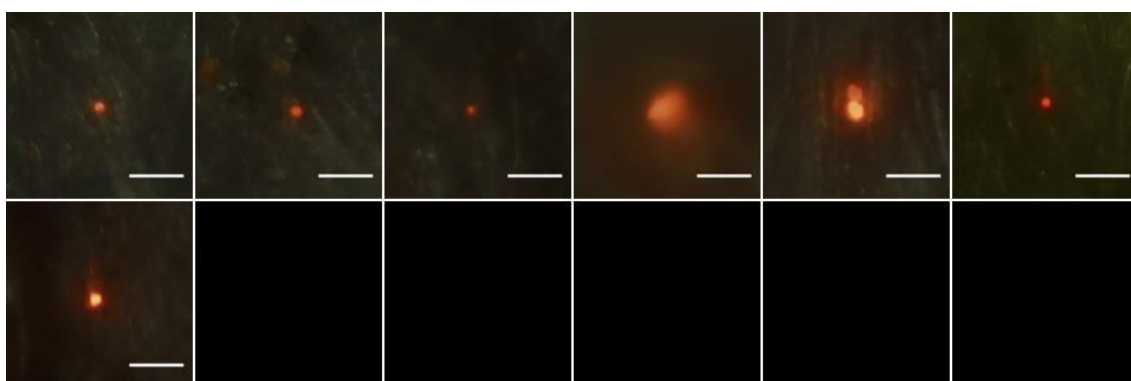

**Figure S98.** Fluorescent particles (suspected microplastics), with a 50  $\mu\text{m}$  scale, observed in 23% of the filter (without blank subtraction) of A164.

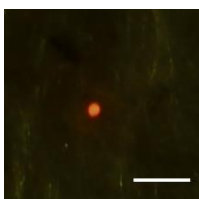

**Figure S99.** Fluorescent particles (suspected microplastics), with a 50  $\mu\text{m}$  scale, observed in 23% of the filter (without blank subtraction) of A165.

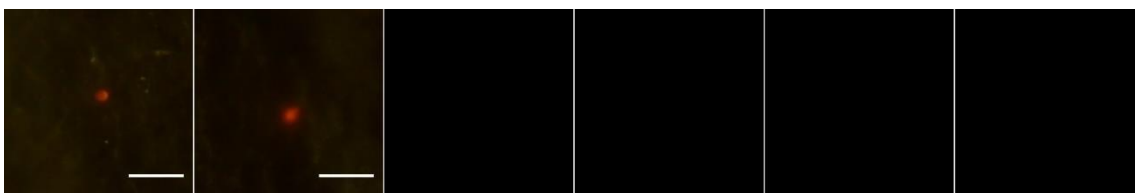

**Figure S100.** Fluorescent particles (suspected microplastics), with a 50  $\mu\text{m}$  scale, observed in 23% of the filter (without blank subtraction) of A168.

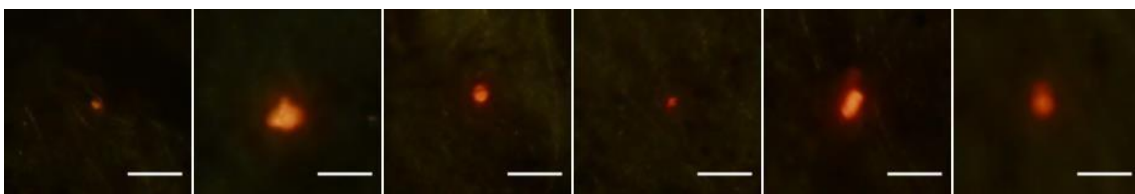

**Figure S101.** Fluorescent particles (suspected microplastics), with a 50  $\mu\text{m}$  scale, observed in 23% of the filter (without blank subtraction) of A169.

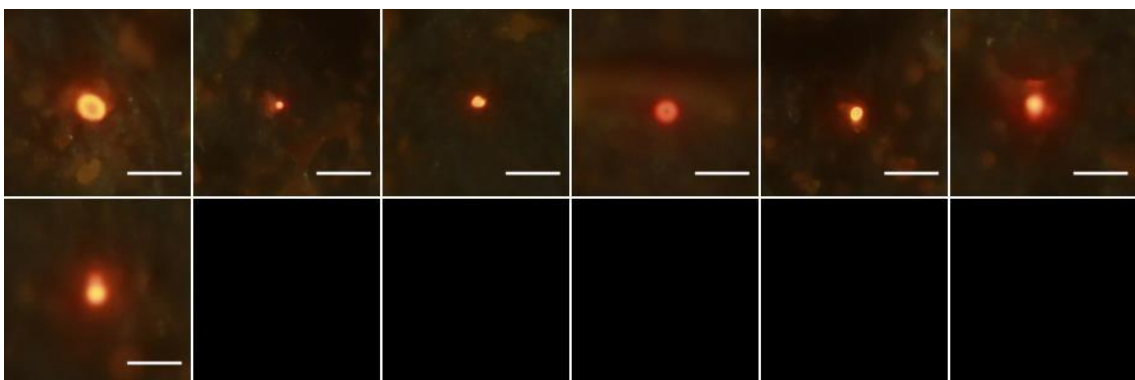

**Figure S102.** Fluorescent particles (suspected microplastics), with a 50  $\mu\text{m}$  scale, observed in 23% of the filter (without blank subtraction) of A170.

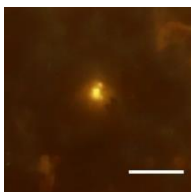

**Figure S103.** Fluorescent particles (suspected microplastics), with a 50  $\mu\text{m}$  scale, observed in 23% of the filter (without blank subtraction) of A171.

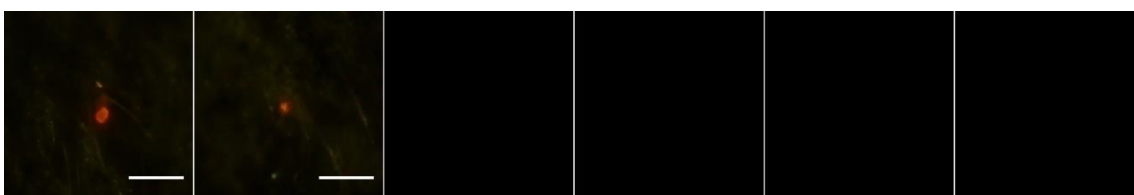

**Figure S104.** Fluorescent particles (suspected microplastics), with a 50  $\mu\text{m}$  scale, observed in 23% of the filter (without blank subtraction) of A174.

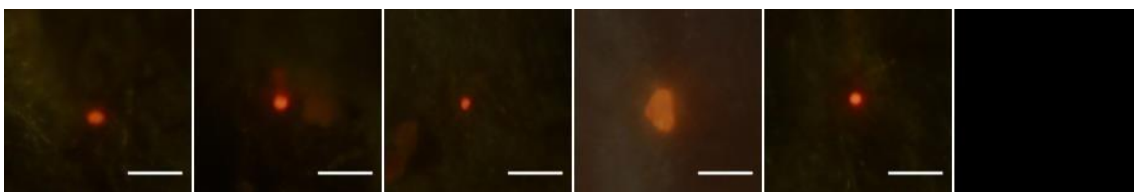

**Figure S105.** Fluorescent particles (suspected microplastics), with a 50  $\mu\text{m}$  scale, observed in 23% of the filter (without blank subtraction) of A175.

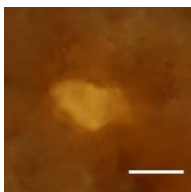

**Figure S106.** Fluorescent particles (suspected microplastics), with a 50  $\mu\text{m}$  scale, observed in 23% of the filter (without blank subtraction) of A176.

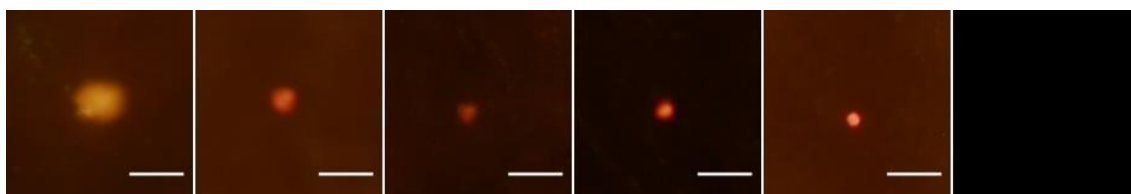

**Figure S107.** Fluorescent particles (suspected microplastics), with a 50  $\mu\text{m}$  scale, observed in 23% of the filter (without blank subtraction) of A178.

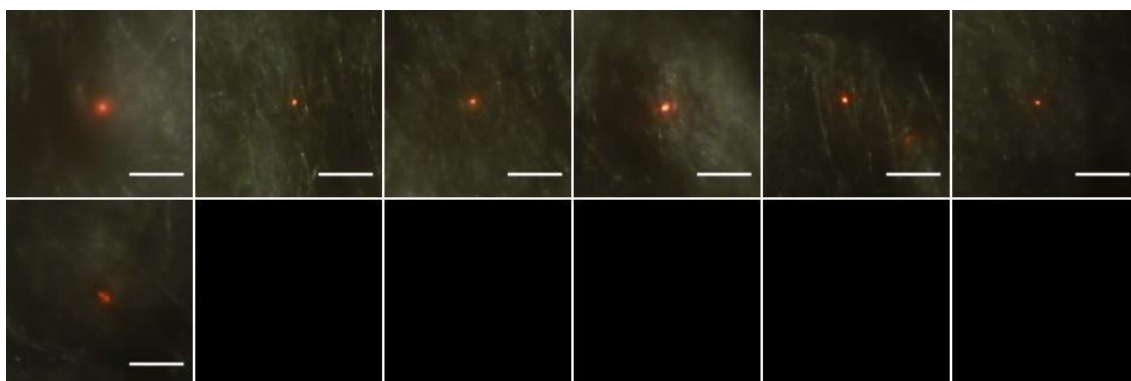

**Figure S108.** Fluorescent particles (suspected microplastics), with a 50  $\mu\text{m}$  scale, observed in 23% of the filter (without blank subtraction) of A179.

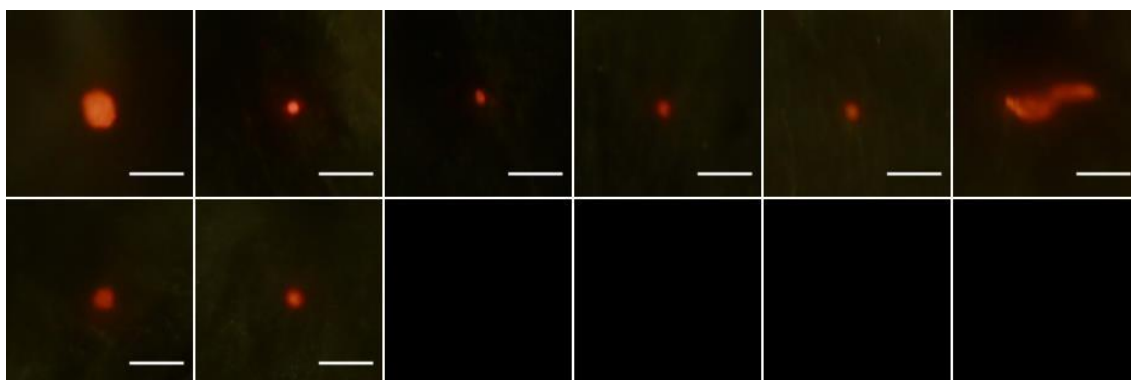

**Figure S109.** Fluorescent particles (suspected microplastics), with a 50  $\mu\text{m}$  scale, observed in 23% of the filter (without blank subtraction) of A180.

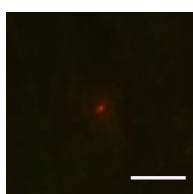

**Figure S110.** Fluorescent particles (suspected microplastics), with a 50  $\mu\text{m}$  scale, observed in 23% of the filter (without blank subtraction) of A182.

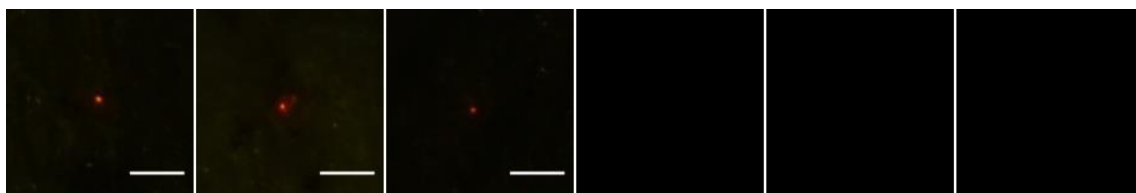

**Figure S111.** Fluorescent particles (suspected microplastics), with a 50  $\mu\text{m}$  scale, observed in 23% of the filter (without blank subtraction) of A185.

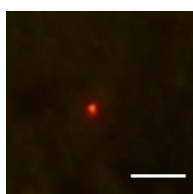

**Figure S112.** Fluorescent particles (suspected microplastics), with a 50  $\mu\text{m}$  scale, observed in 23% of the filter (without blank subtraction) of A186.

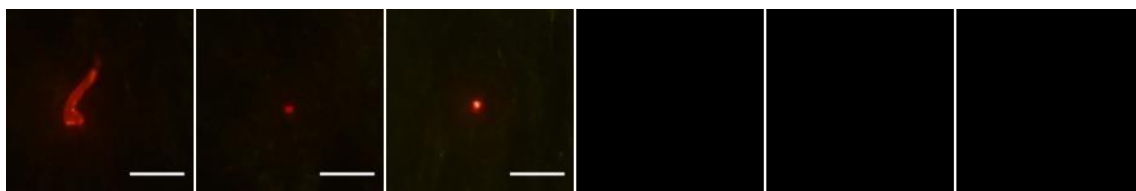

**Figure S113.** Fluorescent particles (suspected microplastics), with a 50  $\mu\text{m}$  scale, observed in 23% of the filter (without blank subtraction) of A189.

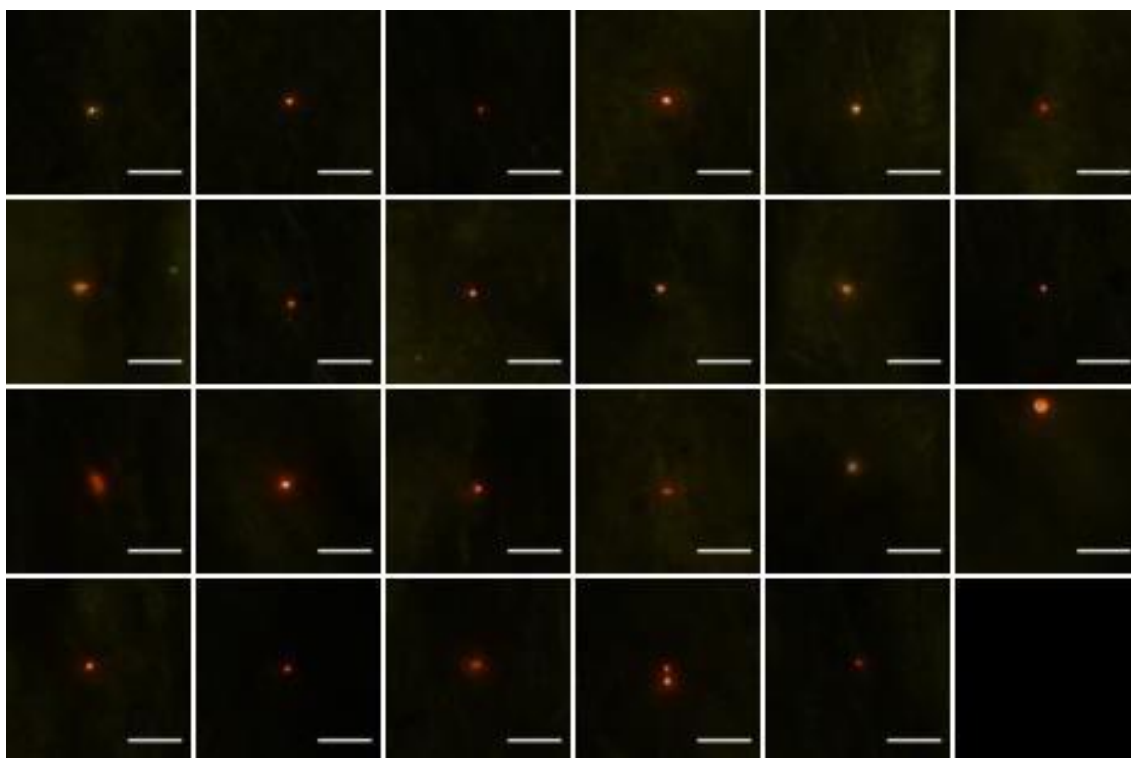

**Figure S114.** Fluorescent particles (suspected microplastics), with a 50  $\mu\text{m}$  scale, observed in 23% of the filter (without blank subtraction) of A190 (two particles in the fourth panel from the right of the last row).

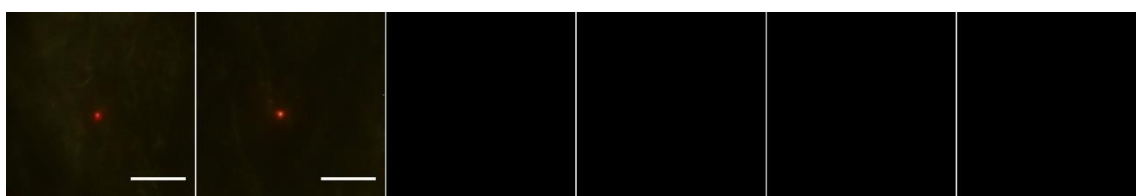

**Figure S115.** Fluorescent particles (suspected microplastics), with a 50  $\mu\text{m}$  scale, observed in 23% of the filter (without blank subtraction) of A191.

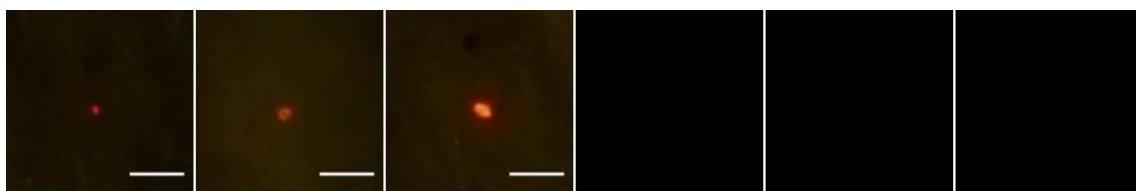

**Figure S116.** Fluorescent particles (suspected microplastics), with a 50  $\mu\text{m}$  scale, observed in 23% of the filter (without blank subtraction) of A192.

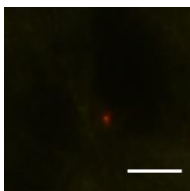

**Figure S117.** Fluorescent particles (suspected microplastics), with a 50  $\mu\text{m}$  scale, observed in 23% of the filter (without blank subtraction) of A193.

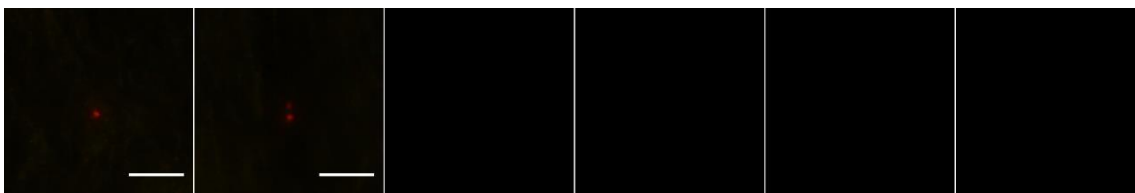

**Figure S118.** Fluorescent particles (suspected microplastics), with a 50  $\mu\text{m}$  scale, observed in 23% of the filter (without blank subtraction) of A194.

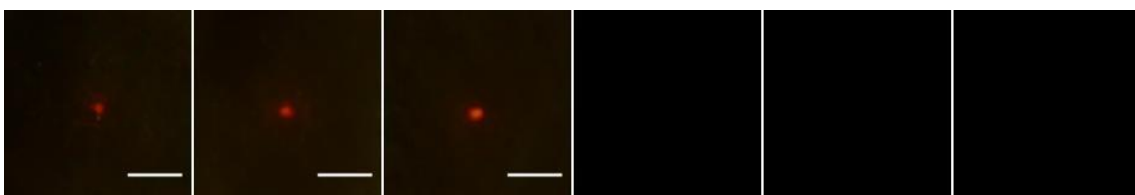

**Figure S119.** Fluorescent particles (suspected microplastics), with a 50  $\mu\text{m}$  scale, observed in 23% of the filter (without blank subtraction) of A196.

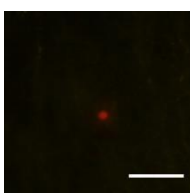

**Figure S120.** Fluorescent particles (suspected microplastics), with a 50  $\mu\text{m}$  scale, observed in 23% of the filter (without blank subtraction) of A199.

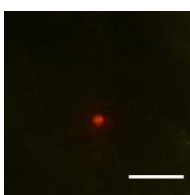

**Figure S121.** Fluorescent particles (suspected microplastics), with a 50  $\mu\text{m}$  scale, observed in 23% of the filter (without blank subtraction) of A200.

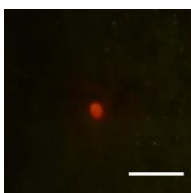

**Figure S122.** Fluorescent particles (suspected microplastics), with a 50  $\mu\text{m}$  scale, observed in 23% of the filter (without blank subtraction) of A202.

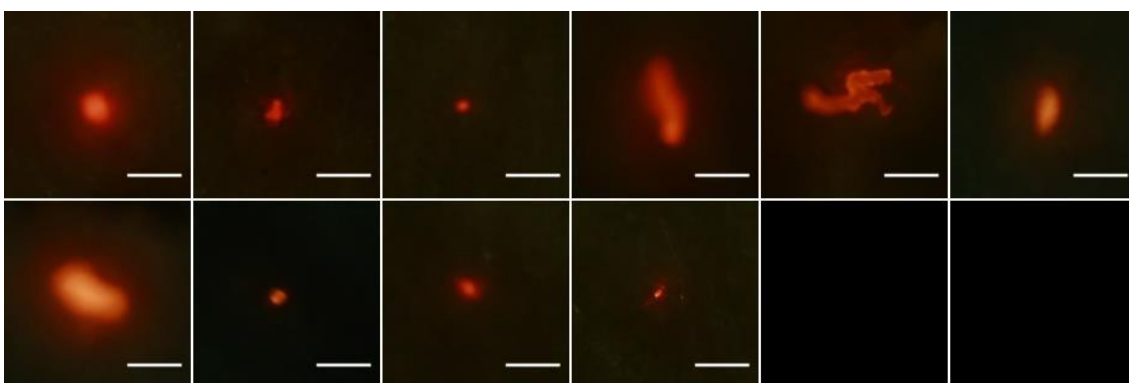

**Figure S123.** Fluorescent particles (suspected microplastics), with a 50  $\mu\text{m}$  scale, observed in 23% of the filter (without blank subtraction) of A203.

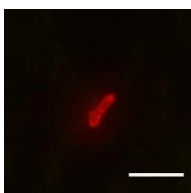

**Figure S124.** Fluorescent particles (suspected microplastics), with a 50  $\mu\text{m}$  scale, observed in 23% of the filter (without blank subtraction) of A204.

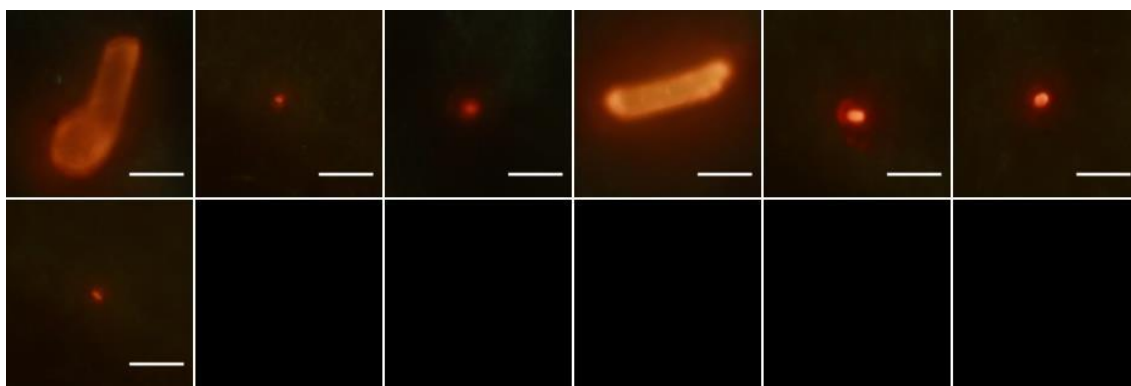

**Figure S125.** Fluorescent particles (suspected microplastics), with a 50  $\mu\text{m}$  scale, observed in 23% of the filter (without blank subtraction) of A205.

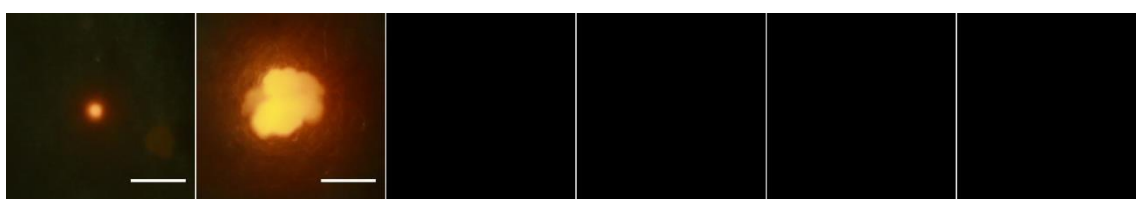

**Figure S126.** Fluorescent particles (suspected microplastics), with a 50  $\mu\text{m}$  scale, observed in 23% of the filter (without blank subtraction) of A206.

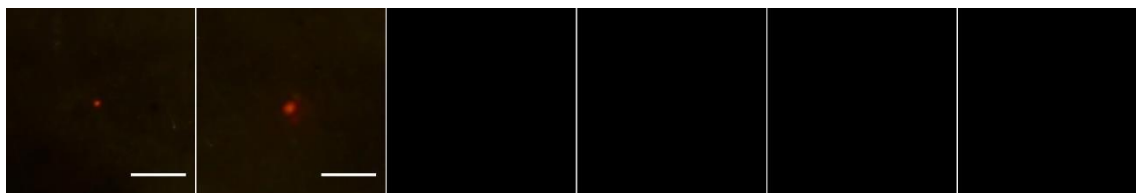

**Figure S127.** Fluorescent particles (suspected microplastics), with a 50  $\mu\text{m}$  scale, observed in 23% of the filter (without blank subtraction) of A207.

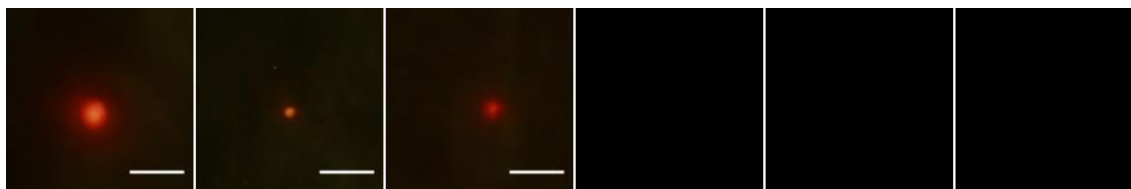

**Figure S128.** Fluorescent particles (suspected microplastics), with a 50  $\mu\text{m}$  scale, observed in 23% of the filter (without blank subtraction) of A208.

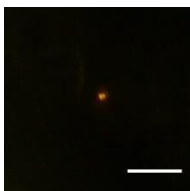

**Figure S129.** Fluorescent particles (suspected microplastics), with a 50 µm scale, observed in 23% of the filter (without blank subtraction) of A210.

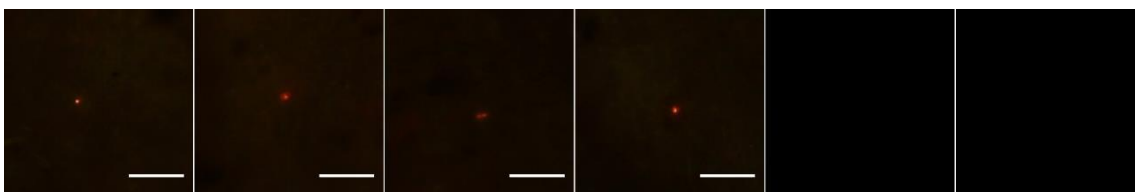

**Figure S130.** Fluorescent particles (suspected microplastics), with a 50 µm scale, observed in 23% of the filter (without blank subtraction) of A212.

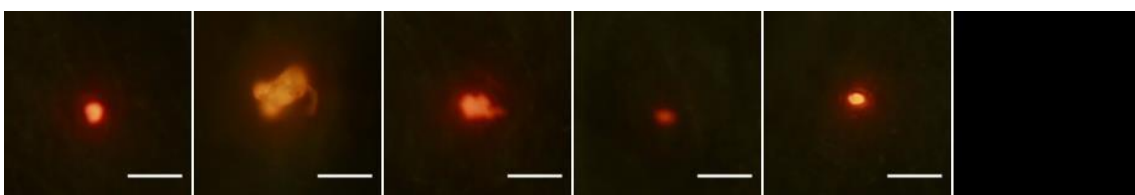

**Figure S131.** Fluorescent particles (suspected microplastics), with a 50 µm scale, observed in 23% of the filter (without blank subtraction) of A214.

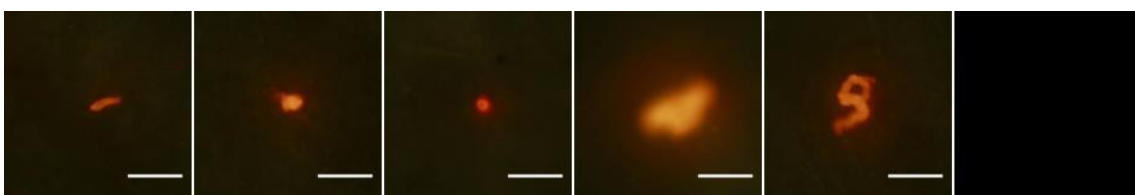

**Figure S132.** Fluorescent particles (suspected microplastics), with a 50 µm scale, observed in 23% of the filter (without blank subtraction) of A215.

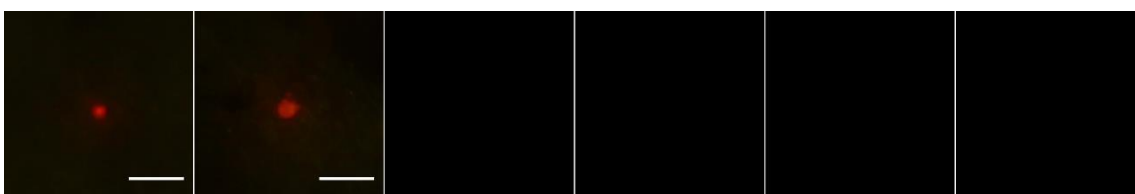

**Figure S133.** Fluorescent particles (suspected microplastics), with a 50  $\mu\text{m}$  scale, observed in 23% of the filter (without blank subtraction) of A216.

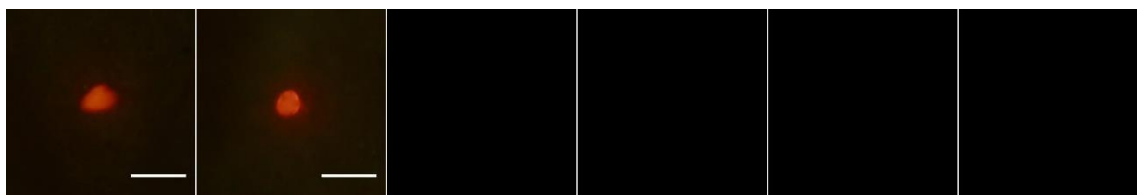

**Figure S134.** Fluorescent particles (suspected microplastics), with a 50  $\mu\text{m}$  scale, observed in 23% of the filter (without blank subtraction) of A217.

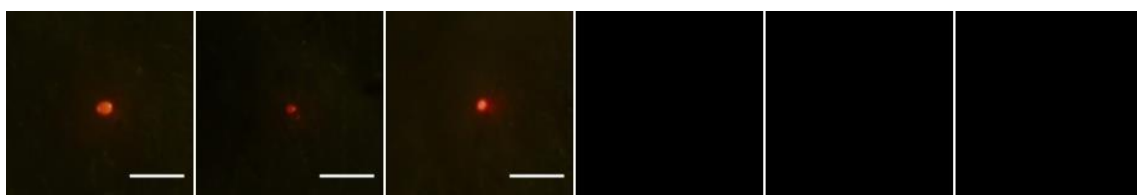

**Figure S135.** Fluorescent particles (suspected microplastics), with a 50  $\mu\text{m}$  scale, observed in 23% of the filter (without blank subtraction) of A218.

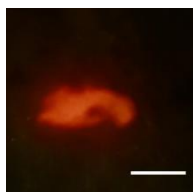

**Figure S136.** Fluorescent particles (suspected microplastics), with a 50  $\mu\text{m}$  scale, observed in 23% of the filter (without blank subtraction) of A220.

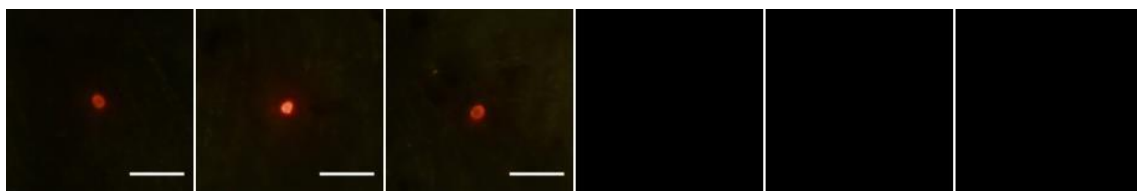

**Figure S137.** Fluorescent particles (suspected microplastics), with a 50  $\mu\text{m}$  scale, observed in 23% of the filter (without blank subtraction) of A223.

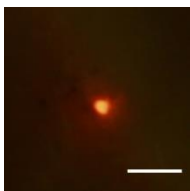

**Figure S138.** Fluorescent particles (suspected microplastics), with a 50  $\mu\text{m}$  scale, observed in 23% of the filter (without blank subtraction) of A227.

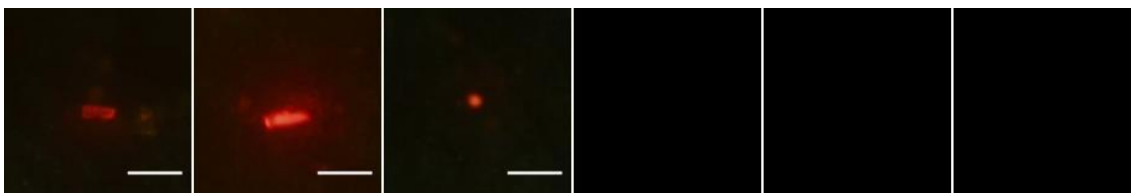

**Figure S139.** Fluorescent particles (suspected microplastics), with a 50  $\mu\text{m}$  scale, observed in 23% of the filter (without blank subtraction) of A230.

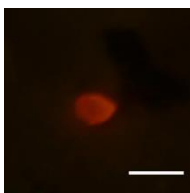

**Figure S140.** Fluorescent particles (suspected microplastics), with a 50  $\mu\text{m}$  scale, observed in 23% of the filter (without blank subtraction) of A231.

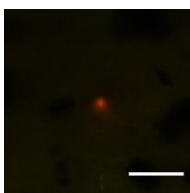

**Figure S141.** Fluorescent particles (suspected microplastics), with a 50  $\mu\text{m}$  scale, observed in 23% of the filter (without blank subtraction) of A232.

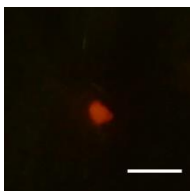

**Figure S142.** Fluorescent particles (suspected microplastics), with a 50  $\mu\text{m}$  scale, observed in 23% of the filter (without blank subtraction) of A235.

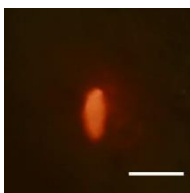

**Figure S143.** Fluorescent particles (suspected microplastics), with a 50  $\mu\text{m}$  scale, observed in 23% of the filter (without blank subtraction) of A236.

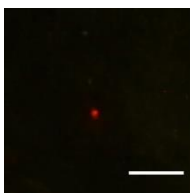

**Figure S144.** Fluorescent particles (suspected microplastics), with a 50  $\mu\text{m}$  scale, observed in 23% of the filter (without blank subtraction) of A239.

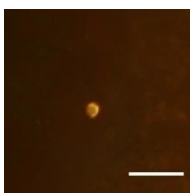

**Figure S145.** Fluorescent particles (suspected microplastics), with a 50  $\mu\text{m}$  scale, observed in 23% of the filter (without blank subtraction) of A241.

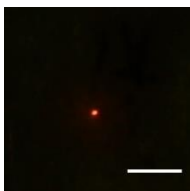

**Figure S146.** Fluorescent particles (suspected microplastics), with a 50 µm scale, observed in 23% of the filter (without blank subtraction) of A247.

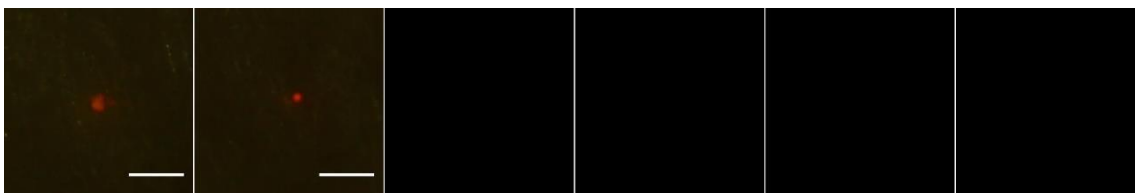

**Figure S147.** Fluorescent particles (suspected microplastics), with a 50 µm scale, observed in 23% of the filter of blank 1 (batch 2).

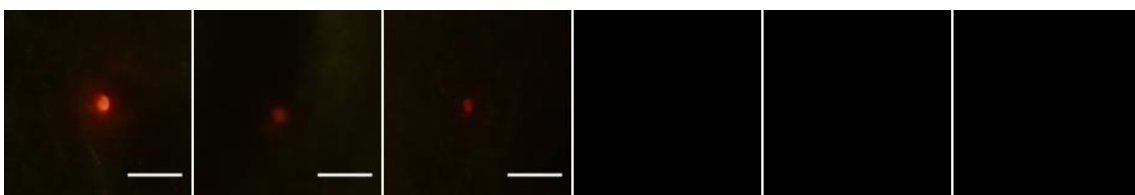

**Figure S148.** Fluorescent particles (suspected microplastics), with a 50 µm scale, observed in 23% of the filter of blank 4 (batch 2).

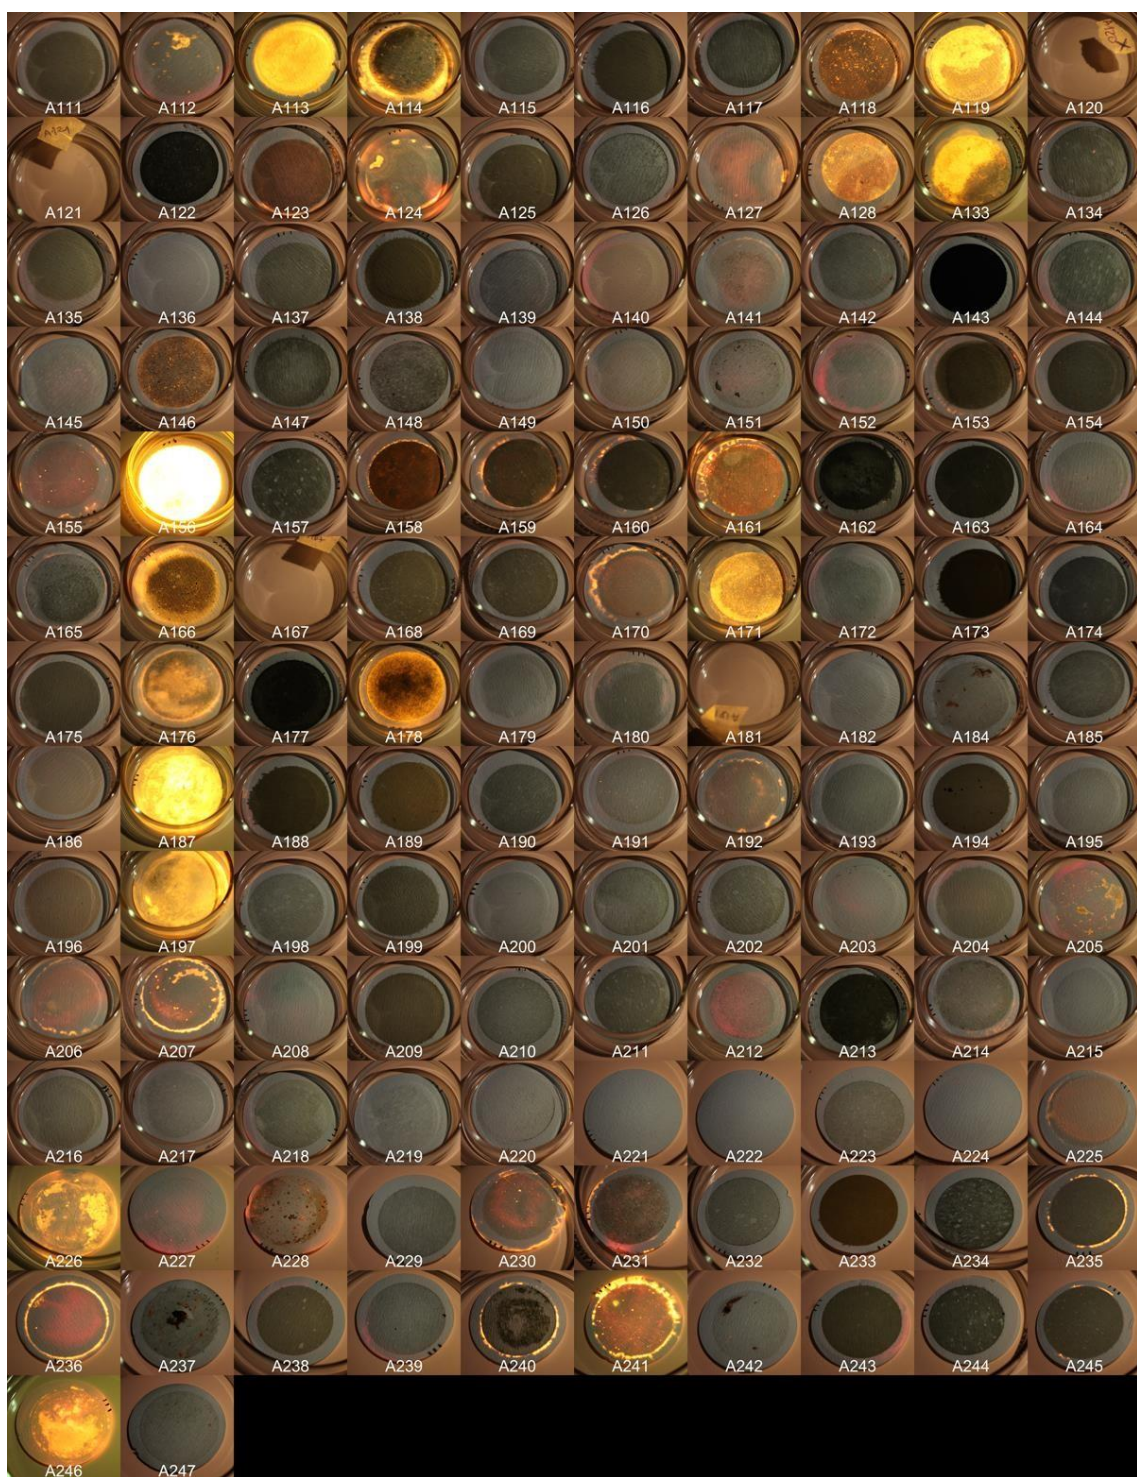

**Figure S149.** Filter membranes of the batch 2 of companion animal samples.

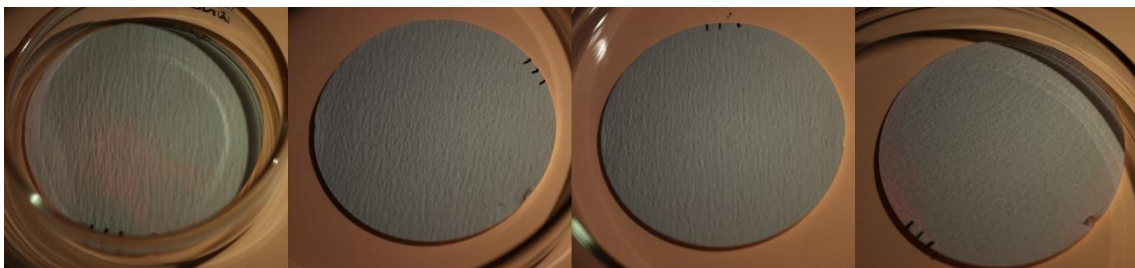

**Figure S150.** Filter membranes of batch 2 blanks.
